# Supplementary material
Source: Royal Society of Chemistry journal article supplement (doi:10.1039/d5en00966a)
Supplement: d5en00966a1.xlsx [file d5en00966a1.xlsx]

## Sheet: Table S1
			Table S1 Summary of raw and clean reads statistics from RNA-sequencing of O. sativa
			Sample	Raw Reads No.	Raw Bases (bp)	Clean Reads No.	Clean Data (bp)	Error rate %	Q20 (%)	Q30 (%)	GC content(%)	Clean reads ratio (%)
			Cd_1	45633700	6890688700	45244260	6670190518	0.012	98.8	95.9	47.95	99.1466
			Cd_2	44455414	6712767514	44133504	6533535343	0.012	98.73	95.96	47.54	99.2759
			Cd_3	41978948	6338821148	41020128	6079808541	0.0121	98.68	95.81	49.99	97.716
			Cd_MT_1	44705858	6750584558	44335530	6610002188	0.0121	98.76	95.86	48.6	99.1716
			Cd_MT_2	44979136	6791849536	44620422	6580336210	0.0121	98.78	95.91	48.15	99.2025
			Cd_MT_3	41852100	6319667100	41554080	6184686144	0.0121	98.71	95.9	47.25	99.2879
			Cd_nZVI_1	44389012	6702740812	44086256	6554089437	0.0121	98.75	95.84	47.81	99.3179
			Cd_nZVI_2	44789874	6763270974	44501850	6608484373	0.012	98.83	96.04	44.72	99.3569
			Cd_nZVI_3	43085410	6505896910	42815826	6309414013	0.0122	98.67	95.73	46.68	99.3743
			Cd_MT_NZVI_1	44917908	6782604108	44643256	6644073612	0.0119	98.82	96.22	41.31	99.3885
			Cd_MT_NZVI_2	41384652	6249082452	41096638	6113428856	0.0121	98.68	95.81	48.65	99.3041
			Cd_MT_NZVI_3	47419874	7160400974	47102052	7017180031	0.0121	98.71	95.89	48.58	99.3298
			Note: Sample: sample name;
			Raw Reads No.: Reads total;
			Raw Bases(bp): Total number of bases;
			Clean Reads No: High Quality Sequence Reads;
			Clean Data (bp): High Quality Sequence Base Number;
			Error rate %: The average error rate of the sequencing base conrresponding to the quality control data is generally less than 0.1%;
			Q20(%): Base recognition accuracy of 99%
			Q30 (%): Percentage of bases with a base identification accuracy of more than 99.9%.
			GC content(%): The percentage of GC base content;

## Sheet: Table S2
				Table S2 Summary of Map statistics from RNA-sequencing of O. sativa
				Sample	Clean_Reads	Total_Mapped	Multiple_Mapped	Uniquely_Mapped
				Cd_1	45244260	41192115(91.04%)	1056411(2.33%)	40135704(88.71%)
				Cd_2	44133504	41940193(95.03%)	1536044(3.48%)	40404149(91.55%)
				Cd_3	41020128	37904065(92.4%)	4708933(11.48%)	33195132(80.92%)
				Cd_MT_1	44335530	42715632(96.35%)	3215600(7.25%)	39500032(89.09%)
				Cd_MT_2	44620422	43136619(96.67%)	4036458(9.05%)	39100161(87.63%)
				Cd_MT_3	41554080	38736170(93.22%)	2338561(5.63%)	36397609(87.59%)
				Cd_nZVI_1	44086256	42243345(95.82%)	1562900(3.55%)	40680445(92.27%)
				Cd_nZVI_2	44501850	30482819(68.5%)	1297142(2.91%)	29185677(65.58%)
				Cd_nZVI_3	42815826	41336005(96.54%)	1627957(3.8%)	39708048(92.74%)
				Cd_MT_NZVI_1	44643256	22748224(50.96%)	568653(1.27%)	22179571(49.68%)
				Cd_MT_NZVI_2	41096638	39730241(96.68%)	2127470(5.18%)	37602771(91.5%)
				Cd_MT_NZVI_3	47102052	45511019(96.62%)	1389826(2.95%)	44121193(93.67%)
				Note: Sample: Sample;
				Clean Reads: Total number of sequences for alignment;
				Total Mapped: Total number of sequences on the reference genome on alignment, percentage Total Mapped/Clean Reads;
				Multiple Mapped: Total number of sequences compared to multiple locations, percentage Multiple Mapped/ Total Mapped;
				Uniquely Mapped: The total number of sequences that are only matched to one position, with a percentage of Uniquely Mapped/Total Mapped.

## Sheet: Table S3
				Table S3 Summary statistics of unigene functional annotations
				Database	All_Gene number(percent)	Expre_Gene number(percent)
				NR	40221(0.9573)	32309(0.9655)
				GO	32667(0.7775)	26461(0.7908)
				KEGG	13765(0.3276)	11598(0.3466)
				eggNOG	33860(0.8059)	27842(0.832)
				Swissprot	27513(0.6548)	22686(0.6779)
				Pfam	23662(0.5632)	20438(0.6108)
				Total_annotation	40239(0.9577)	32324(0.966)
				Total	42015(1.0)	33463(1)
				Note: Database: Database name;
				All_Gene number(percent): The annotation of all coding genes (including the new coding genes obtained) in each database of the species;
				Expre_Gene number(percent): Then annotation of genes expressed in this project (i.e., the expression level in at least one sample is not 0) in each database.

## Sheet: Table S4
Table S4 List of common differentially expressed genes synergistically upregulated by melatonin and nano-zero valent iron (Cd vs Cd-nZVI and Cd vs Cd-MT-nZVI) in O.sativa leaves under Cd containated and Se enriched paddy soil.
Gene ID	Gene Name	Cd_MT_nZVI_vs_Cd_log2fc(Cd_MT_nZVI/Cd)	Cd_nZVI_vs_Cd_log2fc(Cd_nZVI/Cd)		C-D		NR Hit-name	NR Description	GO ID	GO Term	GO Description	KO ID	KO Name	Pathway ID	Pathway Definition	EggNOG	EggNOG Description	Pfam ID	Domain	Domain Description	Swiss-Prot Hit-name	Swiss-Prot Description	Entrez
Os02g0517900		3.82682	3.51422		0.312604		EEC73277.1	hypothetical protein OsI_07420 [Oryza sativa Indica Group]								ENOG41104JU;;ENOG41105Z1	S:Function unknown;;S:Function unknown	PF10536.13;;PF09331.15	PMD;;DUF1985	Plant mobile domain;;Domain of unknown function (DUF1985
Os06g0314501		5.60911	4.83521		0.7739		KAF2926497.1	hypothetical protein DAI22_06g132000 [Oryza sativa Japonica Group]	GO:0007166	biological_process	cell surface receptor signaling pathway
Os11g0531800		1.6142	1.49389		0.120307		KAB8115439.1	hypothetical protein EE612_055915 [Oryza sativa]	GO:0005737;;GO:0016462;;GO:0005634	cellular_component;;molecular_function;;cellular_component	cytoplasm;;pyrophosphatase activity;;nucleus	K07766	E3.6.1.52			COG0494	L:Replication, recombination and repair				sp|Q93ZY7|NUD12_ARATH	Nudix hydrolase 12, mitochondrial OS=Arabidopsis thaliana OX=3702 GN=NUDT12 PE=2 SV=1
Os05g0269000		1.52594	1.42275		0.103192		EEC78876.1	hypothetical protein OsI_19234 [Oryza sativa Indica Group]	GO:0016020	cellular_component	membrane
Os11g0533000		1.87756	1.6005		0.277062		KAB8115444.1	hypothetical protein EE612_055927 [Oryza sativa]
Os11g0641500	OsLAC23	7.48845	6.92496		0.56349		NP_001410152.1	laccase-19 precursor [Oryza sativa Japonica Group]	GO:0046274;;GO:0048046;;GO:0052716;;GO:0005576;;GO:0005507;;GO:0046872;;GO:0016491	biological_process;;cellular_component;;molecular_function;;cellular_component;;molecular_function;;molecular_function;;molecular_function	lignin catabolic process;;apoplast;;hydroquinone:oxygen oxidoreductase activity;;extracellular region;;copper ion binding;;metal ion binding;;oxidoreductase activity	K05909	E1.10.3.2			COG2132	Q:Secondary metabolites biosynthesis, transport and catabolism	PF07732.19;;PF07731.18;;PF00394.26	Cu-oxidase_3;;Cu-oxidase_2;;Cu-oxidase	Multicopper oxidase;;Multicopper oxidase;;Multicopper oxidase	sp|Q2R0L2|LAC19_ORYSJ	Laccase-19 OS=Oryza sativa subsp. japonica OX=39947 GN=LAC19 PE=2 SV=1	4351005
Os07g0190000	OsDXS	5.52113	5.228		0.293126		NP_001408943.1	1-deoxy-D-xylulose-5-phosphate synthase 2, chloroplastic [Oryza sativa Japonica Group]	GO:0052865;;GO:0009536;;GO:0009228;;GO:0046872;;GO:0008661;;GO:0016740;;GO:0003824;;GO:0008299;;GO:0016744;;GO:0016114;;GO:0009507	biological_process;;cellular_component;;biological_process;;molecular_function;;molecular_function;;molecular_function;;molecular_function;;biological_process;;molecular_function;;biological_process;;cellular_component	1-deoxy-D-xylulose 5-phosphate biosynthetic process;;plastid;;thiamine biosynthetic process;;metal ion binding;;1-deoxy-D-xylulose-5-phosphate synthase activity;;transferase activity;;catalytic activity;;isoprenoid biosynthetic process;;transferase activity, transferring aldehyde or ketonic groups;;terpenoid biosynthetic process;;chloroplast	K01662	dxs	map00730;;map00900	Thiamine metabolism;;Terpenoid backbone biosynthesis	COG1154	H:Coenzyme transport and metabolism	PF13292.10;;PF02779.28;;PF02780.24;;PF00676.24;;PF02775.25	DXP_synthase_N;;Transket_pyr;;Transketolase_C;;E1_dh;;TPP_enzyme_C	1-deoxy-D-xylulose-5-phosphate synthase;;Transketolase, pyrimidine binding domain;;Transketolase, C-terminal domain;;Dehydrogenase E1 component;;Thiamine pyrophosphate enzyme, C-terminal TPP binding domain	sp|Q6YU51|DXS2_ORYSJ	Probable 1-deoxy-D-xylulose-5-phosphate synthase 2, chloroplastic OS=Oryza sativa subsp. japonica OX=39947 GN=Os07g0190000 PE=2 SV=1	4342614
Os03g0335200	OsWRKY79	2.72839	2.54883		0.179553		KAB8091685.1	hypothetical protein EE612_017250, partial [Oryza sativa]	GO:0043565;;GO:0003700;;GO:0005634;;GO:0006355;;GO:0003677;;GO:0050896	molecular_function;;molecular_function;;cellular_component;;biological_process;;molecular_function;;biological_process	sequence-specific DNA binding;;transcription factor activity, sequence-specific DNA binding;;nucleus;;regulation of transcription, DNA-templated;;DNA binding;;response to stimulus					ENOG411068C	S:Function unknown	PF03106.19	WRKY	WRKY DNA -binding domain	sp|Q5W6D6|WR451_ORYSJ	Transcription factor WRKY45-1 OS=Oryza sativa subsp. japonica OX=39947 GN=WRKY45-1 PE=2 SV=1
Os01g0188900		1.94637	1.85207		0.094298		XP_052135486.1	palmitoyltransferase akr1-like [Oryza glaberrima]	GO:0009579;;GO:0043229;;GO:0009536;;GO:0005515	cellular_component;;cellular_component;;cellular_component;;molecular_function	thylakoid;;intracellular organelle;;plastid;;protein binding	K24194	BOR			COG0666	S:Function unknown	PF12796.11;;PF00023.34;;PF13606.10;;PF13637.10;;PF13857.10	Ank_2;;Ank;;Ank_3;;Ank_4;;Ank_5	Ankyrin repeats (3 copies;;Ankyrin repeat;;Ankyrin repeat;;Ankyrin repeats (many copies;;Ankyrin repeats (many copies
Os04g0677300		4.68717	3.16849		1.51868		XP_015634205.1	NDR1/HIN1-like protein 6 [Oryza sativa Japonica Group]	GO:0016020	cellular_component	membrane					ENOG410YFY3	S:Function unknown	PF03168.17	LEA_2	Late embryogenesis abundant protein	sp|Q8LD98|NHL6_ARATH	NDR1/HIN1-like protein 6 OS=Arabidopsis thaliana OX=3702 GN=NHL6 PE=1 SV=1	4337404
Os01g0196300	DPF	3.70034	3.17205		0.528291		XP_015626911.1	uncharacterized protein LOC4327325 [Oryza sativa Japonica Group]	GO:0006355;;GO:0005634;;GO:0046983	biological_process;;cellular_component;;molecular_function	regulation of transcription, DNA-templated;;nucleus;;protein dimerization activity					ENOG410ZMUQ	S:Function unknown	PF00010.30	HLH	Helix-loop-helix DNA-binding domain	sp|Q9LTS4|BH041_ARATH	Putative transcription factor bHLH041 OS=Arabidopsis thaliana OX=3702 GN=BHLH41 PE=3 SV=1	4327325
Os02g0800500		1.18815	1.13214		0.0560078		EEE57989.1	hypothetical protein OsJ_08746 [Oryza sativa Japonica Group]	GO:0005737;;GO:0000307;;GO:0016538;;GO:0044772;;GO:0007049;;GO:0005634;;GO:0051301;;GO:0043248	cellular_component;;cellular_component;;molecular_function;;biological_process;;biological_process;;cellular_component;;biological_process;;biological_process	cytoplasm;;cyclin-dependent protein kinase holoenzyme complex;;cyclin-dependent protein serine/threonine kinase regulator activity;;mitotic cell cycle phase transition;;cell cycle;;nucleus;;cell division;;proteasome assembly	K21777	CCNB			COG5024	D:Cell cycle control, cell division, chromosome partitioning	PF00134.27	Cyclin_N	Cyclin, N-terminal domain	sp|Q0DWQ7|CCB12_ORYSJ	Cyclin-B1-2 OS=Oryza sativa subsp. japonica OX=39947 GN=CYCB1-2 PE=3 SV=1
Os03g0255900		2.32059	1.7537		0.566896		ABF95040.1	expressed protein [Oryza sativa Japonica Group]	GO:0016020	cellular_component	membrane					ENOG41119IC;;ENOG411074D	S:Function unknown;;S:Function unknown
Os04g0178300	OsCPS4	6.01714	3.42357		2.59357		NP_001389265.1	syn-copalyl diphosphate synthase, chloroplastic isoform 1 [Oryza sativa Japonica Group]	GO:0009536;;GO:0016853;;GO:0051498;;GO:0010333;;GO:0000287;;GO:0009686;;GO:0006952;;GO:0016102;;GO:0046872;;GO:0016829;;GO:0009507	cellular_component;;molecular_function;;molecular_function;;molecular_function;;molecular_function;;biological_process;;biological_process;;biological_process;;molecular_function;;molecular_function;;cellular_component	plastid;;isomerase activity;;syn-copalyl diphosphate synthase activity;;terpene synthase activity;;magnesium ion binding;;gibberellin biosynthetic process;;defense response;;diterpenoid biosynthetic process;;metal ion binding;;lyase activity;;chloroplast	K14043	CPS4	map00904	Diterpenoid biosynthesis	ENOG410XNXR	I:Lipid transport and metabolism	PF01397.25	Terpene_synth	Terpene synthase, N-terminal domain	sp|Q0JF02|CPS4_ORYSJ	Syn-copalyl diphosphate synthase, chloroplastic OS=Oryza sativa subsp. japonica OX=39947 GN=CPS4 PE=1 SV=1	4335090
Os02g0474000	OsFbox088	1.3096	1.19165		0.117954		XP_015626134.1	F-box only protein 8 [Oryza sativa Japonica Group]								ENOG410ZTSM	S:Function unknown	PF00646.37;;PF12937.11	F-box;;F-box-like	F-box domain;;F-box-like	sp|Q8GXC7|FBK50_ARATH	F-box/kelch-repeat protein At3g06240 OS=Arabidopsis thaliana OX=3702 GN=At3g06240 PE=2 SV=1	4329351
Os09g0551000		6.957	5.94013		1.01687		KAB8111625.1	hypothetical protein EE612_049355 [Oryza sativa]	GO:0006468;;GO:0016020;;GO:0016310;;GO:0004672;;GO:0000166;;GO:0004674;;GO:0016740;;GO:0016301;;GO:0005886;;GO:0106310;;GO:0051707;;GO:0005524;;GO:0048544	biological_process;;cellular_component;;biological_process;;molecular_function;;molecular_function;;molecular_function;;molecular_function;;molecular_function;;cellular_component;;deleted;;biological_process;;molecular_function;;biological_process	protein phosphorylation;;membrane;;phosphorylation;;protein kinase activity;;nucleotide binding;;protein serine/threonine kinase activity;;transferase activity;;kinase activity;;plasma membrane;;old GO;;response to other organism;;ATP binding;;recognition of pollen					COG0515	T:Signal transduction mechanisms	PF01453.28;;PF07714.21;;PF00069.29;;PF08276.15;;PF00954.24	B_lectin;;PK_Tyr_Ser-Thr;;Pkinase;;PAN_2;;S_locus_glycop	D-mannose binding lectin;;Protein tyrosine and serine/threonine kinase;;Protein kinase domain;;PAN-like domain;;S-locus glycoprotein domain	sp|Q9ZT07|RKS1_ARATH	G-type lectin S-receptor-like serine/threonine-protein kinase RKS1 OS=Arabidopsis thaliana OX=3702 GN=RKS1 PE=3 SV=3
Os04g0269800		1.3263	1.05873		0.267567		KAB8095062.1	hypothetical protein EE612_022703 [Oryza sativa]	GO:0006139;;GO:0016818;;GO:0016310;;GO:0016020;;GO:0004674;;GO:0003677;;GO:0003678;;GO:0106310;;GO:0051707;;GO:0005524;;GO:0048544	biological_process;;molecular_function;;biological_process;;cellular_component;;molecular_function;;molecular_function;;molecular_function;;deleted;;biological_process;;molecular_function;;biological_process	nucleobase-containing compound metabolic process;;hydrolase activity, acting on acid anhydrides, in phosphorus-containing anhydrides;;phosphorylation;;membrane;;protein serine/threonine kinase activity;;DNA binding;;DNA helicase activity;;old GO;;response to other organism;;ATP binding;;recognition of pollen
Os02g0269600	OsSub13	7.75586	7.72644		0.0294187		XP_015623992.1	subtilisin-like protease SBT3.5 [Oryza sativa Japonica Group]	GO:0004252;;GO:0008233;;GO:0008236;;GO:0016787;;GO:0006508	molecular_function;;molecular_function;;molecular_function;;molecular_function;;biological_process	serine-type endopeptidase activity;;peptidase activity;;serine-type peptidase activity;;hydrolase activity;;proteolysis					COG1404	O:Posttranslational modification, protein turnover, chaperones	PF00082.26;;PF17766.5;;PF05922.20	Peptidase_S8;;fn3_6;;Inhibitor_I9	Subtilase family;;Fibronectin type-III domain;;Peptidase inhibitor I9	sp|Q9MAP7|SBT35_ARATH	Subtilisin-like protease SBT3.5 OS=Arabidopsis thaliana OX=3702 GN=SBT3.5 PE=1 SV=1
Os10g0563800		2.1027	2.03223		0.0704731
Os03g0103800		1.62608	1.44593		0.180154		XP_025879440.1	uncharacterized protein LOC4331306 [Oryza sativa Japonica Group]	GO:0003779;;GO:0110165	molecular_function;;cellular_component	actin binding;;cellular anatomical entity					ENOG41103T8	S:Function unknown
Os03g0710000		2.34893	1.65346		0.695467		XP_015632740.1	uncharacterized protein LOC4333874 [Oryza sativa Japonica Group]	GO:0015031;;GO:0008104	biological_process;;biological_process	protein transport;;protein localization					ENOG410YG52	S:Function unknown	PF03398.18	Ist1	Regulator of Vps4 activity in the MVB pathway	sp|Q54I39|IST1L_DICDI	IST1-like protein OS=Dictyostelium discoideum OX=44689 GN=DDB_G0289029 PE=3 SV=1	4333874
Os04g0385900		1.89452	1.52821		0.366309		XP_015634820.1	uncharacterized protein LOC9270560 [Oryza sativa Japonica Group]								ENOG41103Z2;;ENOG411299P	S:Function unknown;;S:Function unknown						9270560
Os08g0347000		5.81189	5.69984		0.112051		BAT05045.1	Os08g0347000, partial [Oryza sativa Japonica Group]
Os04g0492400		2.14256	2.11776		0.0247918		XP_052152617.1	uncharacterized protein LOC127770885 isoform X1 [Oryza glaberrima]	GO:0008757	molecular_function	S-adenosylmethionine-dependent methyltransferase activity					ENOG4111NE8	S:Function unknown	PF10294.13;;PF13489.10	Methyltransf_16;;Methyltransf_23	Lysine methyltransferase;;Methyltransferase domain	sp|Q2KIJ2|MET18_BOVIN	Histidine protein methyltransferase 1 homolog OS=Bos taurus OX=9913 GN=METTL18 PE=2 SV=1	4336255
Os06g0717900		2.96104	2.142		0.819033		XP_015641482.1	aspartyl protease family protein 1 [Oryza sativa Japonica Group]	GO:0006508;;GO:0008233;;GO:0016787;;GO:0004190;;GO:0003677	biological_process;;molecular_function;;molecular_function;;molecular_function;;molecular_function	proteolysis;;peptidase activity;;hydrolase activity;;aspartic-type endopeptidase activity;;DNA binding					ENOG410XNV7	O:Posttranslational modification, protein turnover, chaperones	PF14543.10;;PF00026.27;;PF14541.10	TAXi_N;;Asp;;TAXi_C	Xylanase inhibitor N-terminal;;Eukaryotic aspartyl protease;;Xylanase inhibitor C-terminal	sp|Q8VYV9|APF1_ARATH	Aspartyl protease family protein 1 OS=Arabidopsis thaliana OX=3702 GN=APF1 PE=2 SV=1	4342085
Os03g0337200		1.64739	1.13566		0.511723		KAB8091702.1	hypothetical protein EE612_017271 [Oryza sativa]	GO:0016020	cellular_component	membrane
Os04g0227500		2.37598	1.88188		0.4941		XP_015636456.1	uncharacterized protein LOC4335218 [Oryza sativa Japonica Group]								ENOG4111WGZ	S:Function unknown	PF01323.24;;PF13462.10	DSBA;;Thioredoxin_4	DSBA-like thioredoxin domain;;Thioredoxin			4335218
Os03g0392250		1.7716	1.27497		0.496631		BAS84532.1	Os03g0392250, partial [Oryza sativa Japonica Group]	GO:0005794;;GO:0016192;;GO:0034067;;GO:0006886;;GO:0003924;;GO:0043001;;GO:0005525	cellular_component;;biological_process;;biological_process;;biological_process;;molecular_function;;biological_process;;molecular_function	Golgi apparatus;;vesicle-mediated transport;;protein localization to Golgi apparatus;;intracellular protein transport;;GTPase activity;;Golgi to plasma membrane protein transport;;GTP binding	K07952	ARFRP1			ENOG410ZMDV	S:Function unknown
Os05g0480200	OsTRXh9	4.8443	4.83159		0.0127096		EEC79406.1	hypothetical protein OsI_20355 [Oryza sativa Indica Group]	GO:0005737;;GO:0016020	cellular_component;;cellular_component	cytoplasm;;membrane	K03671	TXN, trxA			COG0526	O:Posttranslational modification, protein turnover, chaperones	PF00085.24;;PF13098.10;;PF13905.10;;PF14595.10;;PF13899.10	Thioredoxin;;Thioredoxin_2;;Thioredoxin_8;;Thioredoxin_9;;Thioredoxin_7	Thioredoxin;;Thioredoxin-like domain;;Thioredoxin-like;;Thioredoxin;;Thioredoxin-like	sp|Q75GM1|TRXH5_ORYSJ	Thioredoxin H5 OS=Oryza sativa subsp. japonica OX=39947 GN=Os05g0480200 PE=2 SV=1	4339117
Os02g0327000	OsGAP1	1.86219	1.17087		0.691326		NP_001403513.1	gTPase activating protein 1 [Oryza sativa Japonica Group]	GO:0005737;;GO:1901002;;GO:0016020;;GO:1900426;;GO:0043547;;GO:0005634;;GO:0009738;;GO:0005096;;GO:0008289;;GO:0009611;;GO:0006952;;GO:0005515;;GO:0005886;;GO:0009651;;GO:0046872;;GO:0005829	cellular_component;;biological_process;;cellular_component;;biological_process;;biological_process;;cellular_component;;biological_process;;molecular_function;;molecular_function;;biological_process;;biological_process;;molecular_function;;cellular_component;;biological_process;;molecular_function;;cellular_component	cytoplasm;;positive regulation of response to salt stress;;membrane;;positive regulation of defense response to bacterium;;positive regulation of GTPase activity;;nucleus;;abscisic acid-activated signaling pathway;;GTPase activator activity;;lipid binding;;response to wounding;;defense response;;protein binding;;plasma membrane;;response to salt stress;;metal ion binding;;cytosol					COG5038;;ENOG410Y1JN	S:Function unknown;;S:Function unknown	PF00168.34	C2	C2 domain	sp|A2X479|GAP1_ORYSI	GTPase activating protein 1 OS=Oryza sativa subsp. indica OX=39946 GN=OsI_07012 PE=3 SV=1	4329192
Os04g0518100	OsPAL02	1.297	1.25138		0.0456224		XP_015635507.1	phenylalanine ammonia-lyase-like [Oryza sativa Japonica Group]	GO:0005737;;GO:0016841;;GO:0006559;;GO:0016829;;GO:0009800;;GO:0003824;;GO:0045548;;GO:0009698	cellular_component;;molecular_function;;biological_process;;molecular_function;;biological_process;;molecular_function;;molecular_function;;biological_process	cytoplasm;;ammonia-lyase activity;;L-phenylalanine catabolic process;;lyase activity;;cinnamic acid biosynthetic process;;catalytic activity;;phenylalanine ammonia-lyase activity;;phenylpropanoid metabolic process	K13064	PTAL	map00940;;map00360	Phenylpropanoid biosynthesis;;Phenylalanine metabolism	COG2986	E:Amino acid transport and metabolism	PF00221.23	Lyase_aromatic	Aromatic amino acid lyase	sp|P14717|PAL1_ORYSJ	Phenylalanine ammonia-lyase OS=Oryza sativa subsp. japonica OX=39947 GN=PAL PE=1 SV=2	9271676
Os02g0218400	OsRLCK68	2.86327	2.37738		0.485889		KAF2943781.1	hypothetical protein DAI22_02g091400 [Oryza sativa Japonica Group]	GO:0016310;;GO:0006468;;GO:0016301;;GO:0005524;;GO:0004672	biological_process;;biological_process;;molecular_function;;molecular_function;;molecular_function	phosphorylation;;protein phosphorylation;;kinase activity;;ATP binding;;protein kinase activity					COG0515	T:Signal transduction mechanisms	PF00069.29;;PF07714.21;;PF00582.30	Pkinase;;PK_Tyr_Ser-Thr;;Usp	Protein kinase domain;;Protein tyrosine and serine/threonine kinase;;Universal stress protein family	sp|Q9FKG5|PUB51_ARATH	U-box domain-containing protein 51 OS=Arabidopsis thaliana OX=3702 GN=PUB51 PE=2 SV=2
Os03g0423850		1.84553	1.72598		0.119559		KAB8092248.1	hypothetical protein EE612_018189, partial [Oryza sativa]	GO:0006310;;GO:0000723;;GO:0006281;;GO:0032508;;GO:0005657;;GO:0006260;;GO:0016887;;GO:0003678;;GO:0005524	biological_process;;biological_process;;biological_process;;biological_process;;cellular_component;;biological_process;;molecular_function;;molecular_function;;molecular_function	DNA recombination;;telomere maintenance;;DNA repair;;DNA duplex unwinding;;replication fork;;DNA replication;;ATPase activity;;DNA helicase activity;;ATP binding					COG0507;;ENOG410XWH8	L:Replication, recombination and repair;;S:Function unknown	PF21530.1;;PF13538.10;;PF02689.18	Pif1_2B_dom;;UvrD_C_2;;Herpes_Helicase	DNA helicase Pif1, 2B domain;;UvrD-like helicase C-terminal domain;;Helicase	sp|Q7ZV90|PIF1_DANRE	ATP-dependent DNA helicase PIF1 OS=Danio rerio OX=7955 GN=pif1 PE=2 SV=1
Os02g0477100		1.13205	1.05414		0.0779097		BAS78659.1	Os02g0477200 [Oryza sativa Japonica Group]
Os07g0587500		1.82808	1.79333		0.0347527		BAH01327.1	unnamed protein product [Oryza sativa Japonica Group]	GO:0005737;;GO:0005634;;GO:0005515	cellular_component;;cellular_component;;molecular_function	cytoplasm;;nucleus;;protein binding					ENOG410XRTN	S:Function unknown	PF00514.27;;PF14664.10	Arm;;RICTOR_N	Armadillo/beta-catenin-like repeat;;Rapamycin-insensitive companion of mTOR, N-term	sp|Q8GWV5|PUB3_ARATH	U-box domain-containing protein 3 OS=Arabidopsis thaliana OX=3702 GN=PUB3 PE=2 SV=2	4343758
Os02g0582800		3.12435	2.62566		0.498691		XP_015624101.1	uncharacterized protein LOC4329796 [Oryza sativa Japonica Group]								ENOG41107FJ	S:Function unknown				sp|F4JDJ0|HIP47_ARATH	Heavy metal-associated isoprenylated plant protein 47 OS=Arabidopsis thaliana OX=3702 GN=HIPP47 PE=3 SV=1	4329796
Os09g0446700		5.28519	4.57767		0.707521		XP_015611402.1	uncharacterized protein LOC107278616 [Oryza sativa Japonica Group]	GO:0016020	cellular_component	membrane					ENOG410Z762	S:Function unknown						107278616
Os12g0297400		1.31301	1.04431		0.268708		BAF29631.1	Os12g0297400 [Oryza sativa Japonica Group]
Os02g0643800	OsSAUR11	2.97009	2.27103		0.699057		XP_015623733.1	auxin-responsive protein SAUR36 [Oryza sativa Japonica Group]	GO:0009733	biological_process	response to auxin	K14488	SAUR	map04075	Plant hormone signal transduction	ENOG410YVYP	S:Function unknown	PF02519.18	Auxin_inducible	Auxin responsive protein	sp|O22150|SAU36_ARATH	Auxin-responsive protein SAUR36 OS=Arabidopsis thaliana OX=3702 GN=SAUR36 PE=2 SV=1	4330132
Os12g0434400		8.023	5.8682		2.1548		XP_015619002.1	putative leucine aminopeptidase 1 [Oryza sativa Japonica Group]	GO:0005737;;GO:0019538;;GO:0030145;;GO:0070006;;GO:0006508;;GO:0008233;;GO:0046872;;GO:0009507	cellular_component;;biological_process;;molecular_function;;molecular_function;;biological_process;;molecular_function;;molecular_function;;cellular_component	cytoplasm;;protein metabolic process;;manganese ion binding;;metalloaminopeptidase activity;;proteolysis;;peptidase activity;;metal ion binding;;chloroplast	K01255	CARP, pepA	map00480	Glutathione metabolism	COG0260	E:Amino acid transport and metabolism	PF00883.25;;PF02789.21	Peptidase_M17;;Peptidase_M17_N	Cytosol aminopeptidase family, catalytic domain;;Cytosol aminopeptidase family, N-terminal domain	sp|Q2QSB9|AMPL1_ORYSJ	Putative leucine aminopeptidase 1 OS=Oryza sativa subsp. japonica OX=39947 GN=Os12g0434400 PE=3 SV=2
Os06g0140200		1.3152	1.17002		0.145177		XP_015644378.1	receptor-like protein EIX2 [Oryza sativa Japonica Group]	GO:0016020	cellular_component	membrane					COG4886	S:Function unknown	PF00560.37;;PF13855.10;;PF12799.11;;PF08263.16	LRR_1;;LRR_8;;LRR_4;;LRRNT_2	Leucine Rich Repeat;;Leucine rich repeat;;Leucine Rich repeats (2 copies;;Leucine rich repeat N-terminal domain	sp|Q6JN47|EIX1_SOLLC	Receptor-like protein EIX1 OS=Solanum lycopersicum OX=4081 GN=EIX1 PE=2 SV=2	4340067
Os03g0213900		1.40589	1.11501		0.290876		KAB8090791.1	hypothetical protein EE612_016099, partial [Oryza sativa]	GO:0005634;;GO:0046872;;GO:0003723;;GO:0003993	cellular_component;;molecular_function;;molecular_function;;molecular_function	nucleus;;metal ion binding;;RNA binding;;acid phosphatase activity	K25780	KHDC4, BLOM7			ENOG4111HJ7	S:Function unknown				sp|Q32SG5|RIK_MAIZE	Protein RIK OS=Zea mays OX=4577 PE=1 SV=1
Os02g0216700		2.12711	1.93084		0.196278		KAF2943770.1	hypothetical protein DAI22_02g090300 [Oryza sativa Japonica Group]	GO:0046872;;GO:0003993	molecular_function;;molecular_function	metal ion binding;;acid phosphatase activity	K22390	ACP7			COG1409	S:Function unknown				sp|Q9LMX4|PPA1_ARATH	Probable inactive purple acid phosphatase 1 OS=Arabidopsis thaliana OX=3702 GN=PAP1 PE=2 SV=1
Os02g0145600		1.362	1.04287		0.319133		XP_025878608.1	serine/arginine repetitive matrix protein 1 [Oryza sativa Japonica Group]	GO:0016020;;GO:0003677	cellular_component;;molecular_function	membrane;;DNA binding
Os09g0442100	OsRLCK272	2.03829	1.96009		0.0781988		XP_015651234.1	serine/threonine-protein kinase RIPK [Oryza sativa Japonica Group]	GO:0016310;;GO:0006468;;GO:0005524;;GO:0004672	biological_process;;biological_process;;molecular_function;;molecular_function	phosphorylation;;protein phosphorylation;;ATP binding;;protein kinase activity					COG0515	T:Signal transduction mechanisms	PF07714.21;;PF00069.29	PK_Tyr_Ser-Thr;;Pkinase	Protein tyrosine and serine/threonine kinase;;Protein kinase domain	sp|Q9ZUF4|RIPK_ARATH	Serine/threonine-protein kinase RIPK OS=Arabidopsis thaliana OX=3702 GN=RIPK PE=1 SV=1	4347179
Os07g0684400		1.95274	1.34786		0.604872		XP_015646914.1	vegetative cell wall protein gp1 [Oryza sativa Japonica Group]															4344322
Os02g0712700		3.18103	2.77791		0.403116		XP_025878636.1	probable L-type lectin-domain containing receptor kinase S.5 [Oryza sativa Japonica Group]	GO:0006468;;GO:0016020;;GO:0016310;;GO:0004672;;GO:0030246;;GO:0000166;;GO:0004675;;GO:0016740;;GO:0002229;;GO:0016301;;GO:0005886;;GO:0005524;;GO:0042742	biological_process;;cellular_component;;biological_process;;molecular_function;;molecular_function;;molecular_function;;molecular_function;;molecular_function;;biological_process;;molecular_function;;cellular_component;;molecular_function;;biological_process	protein phosphorylation;;membrane;;phosphorylation;;protein kinase activity;;carbohydrate binding;;nucleotide binding;;transmembrane receptor protein serine/threonine kinase activity;;transferase activity;;defense response to oomycetes;;kinase activity;;plasma membrane;;ATP binding;;defense response to bacterium					COG0515	T:Signal transduction mechanisms	PF00139.23;;PF07714.21;;PF00069.29	Lectin_legB;;PK_Tyr_Ser-Thr;;Pkinase	Legume lectin domain;;Protein tyrosine and serine/threonine kinase;;Protein kinase domain	sp|Q9FG33|LRKS5_ARATH	Probable L-type lectin-domain containing receptor kinase S.5 OS=Arabidopsis thaliana OX=3702 GN=LECRKS5 PE=2 SV=1
Os01g0310500	OsRLCK31	1.19016	1.07453		0.115629		XP_015648999.1	dual specificity protein kinase zak2 [Oryza sativa Japonica Group]	GO:0006468;;GO:0016301;;GO:0016310;;GO:0004672;;GO:0000166;;GO:0004674;;GO:0016740;;GO:0007166;;GO:0005886;;GO:0005524	biological_process;;molecular_function;;biological_process;;molecular_function;;molecular_function;;molecular_function;;molecular_function;;biological_process;;cellular_component;;molecular_function	protein phosphorylation;;kinase activity;;phosphorylation;;protein kinase activity;;nucleotide binding;;protein serine/threonine kinase activity;;transferase activity;;cell surface receptor signaling pathway;;plasma membrane;;ATP binding					COG0515	T:Signal transduction mechanisms	PF07714.21;;PF00069.29	PK_Tyr_Ser-Thr;;Pkinase	Protein tyrosine and serine/threonine kinase;;Protein kinase domain	sp|Q9LMN7|WAK5_ARATH	Wall-associated receptor kinase 5 OS=Arabidopsis thaliana OX=3702 GN=WAK5 PE=2 SV=1
Os09g0439100		1.42682	1.01572		0.4111		XP_025880099.1	probable glucomannan 4-beta-mannosyltransferase 4 isoform X2 [Oryza sativa Japonica Group]	GO:0005794;;GO:0047259;;GO:0005840;;GO:0016020;;GO:1990904;;GO:0000139;;GO:0003735;;GO:0071555;;GO:0051753;;GO:0016757;;GO:0006412	cellular_component;;molecular_function;;cellular_component;;cellular_component;;cellular_component;;cellular_component;;molecular_function;;biological_process;;molecular_function;;molecular_function;;biological_process	Golgi apparatus;;glucomannan 4-beta-mannosyltransferase activity;;ribosome;;membrane;;ribonucleoprotein complex;;Golgi membrane;;structural constituent of ribosome;;cell wall organization;;mannan synthase activity;;transferase activity, transferring glycosyl groups;;translation	K13680	CSLA			COG1215	M:Cell wall/membrane/envelope biogenesis	PF13632.10	Glyco_trans_2_3	Glycosyl transferase family group 2	sp|Q8S7W0|CSLA4_ORYSJ	Probable glucomannan 4-beta-mannosyltransferase 4 OS=Oryza sativa subsp. japonica OX=39947 GN=CSLA4 PE=2 SV=1
Os02g0518400		1.44574	1.33769		0.108049		BAF08879.1	Os02g0518400 [Oryza sativa Japonica Group]	GO:0003700;;GO:0006355;;GO:0005634;;GO:0016020	molecular_function;;biological_process;;cellular_component;;cellular_component	transcription factor activity, sequence-specific DNA binding;;regulation of transcription, DNA-templated;;nucleus;;membrane					COG5048	S:Function unknown
Os07g0535800		3.72357	3.00229		0.721278		KAB8105736.1	hypothetical protein EE612_039761 [Oryza sativa]	GO:0006468;;GO:0016301;;GO:0016310;;GO:0016020;;GO:0004674;;GO:0004672;;GO:0005886;;GO:0005524	biological_process;;molecular_function;;biological_process;;cellular_component;;molecular_function;;molecular_function;;cellular_component;;molecular_function	protein phosphorylation;;kinase activity;;phosphorylation;;membrane;;protein serine/threonine kinase activity;;protein kinase activity;;plasma membrane;;ATP binding					COG0515	T:Signal transduction mechanisms	PF07714.21;;PF00069.29;;PF01657.21	PK_Tyr_Ser-Thr;;Pkinase;;Stress-antifung	Protein tyrosine and serine/threonine kinase;;Protein kinase domain;;Salt stress response/antifungal	sp|Q0D5R3|CRK6_ORYSJ	Cysteine-rich receptor-like protein kinase 6 OS=Oryza sativa subsp. japonica OX=39947 GN=CRK6 PE=1 SV=1
Os09g0542900		3.38559	3.36076		0.0248263		XP_015612146.1	uncharacterized protein At1g76070 [Oryza sativa Japonica Group]								ENOG410YQZK	S:Function unknown				sp|Q9SGS5|Y1607_ARATH	Uncharacterized protein At1g76070 OS=Arabidopsis thaliana OX=3702 GN=At1g76070 PE=1 SV=1	4347744
Os05g0335401		1.07657	1.0367		0.0398658		EEC79002.1	hypothetical protein OsI_19505 [Oryza sativa Indica Group]	GO:0000287;;GO:0140326;;GO:0016020;;GO:0000166;;GO:0045332;;GO:0016887;;GO:0005886;;GO:0015914;;GO:0005524	molecular_function;;molecular_function;;cellular_component;;molecular_function;;biological_process;;molecular_function;;cellular_component;;biological_process;;molecular_function	magnesium ion binding;;ATPase-coupled intramembrane lipid transporter activity;;membrane;;nucleotide binding;;phospholipid translocation;;ATPase activity;;plasma membrane;;phospholipid transport;;ATP binding	K01530	E7.6.2.1			COG0474;;ENOG410XPYK	P:Inorganic ion transport and metabolism;;U:Intracellular trafficking, secretion, and vesicular transport	PF13246.10	Cation_ATPase	Cation transport ATPase (P-type	sp|P98205|ALA2_ARATH	Phospholipid-transporting ATPase 2 OS=Arabidopsis thaliana OX=3702 GN=ALA2 PE=1 SV=1
Os10g0204300		1.74498	1.34243		0.402556		KAF2912939.1	hypothetical protein DAI22_10g050100 [Oryza sativa Japonica Group]	GO:0016310;;GO:0005829;;GO:0016301;;GO:0004612;;GO:0005524;;GO:0006094	biological_process;;cellular_component;;molecular_function;;molecular_function;;molecular_function;;biological_process	phosphorylation;;cytosol;;kinase activity;;phosphoenolpyruvate carboxykinase (ATP) activity;;ATP binding;;gluconeogenesis	K01610	pckA	map00020;;map00010;;map00620;;map00710	Citrate cycle (TCA cycle;;Glycolysis / Gluconeogenesis;;Pyruvate metabolism;;Carbon fixation in photosynthetic organisms	COG1866	C:Energy production and conversion				sp|Q9SLZ0|PCKA_MAIZE	Phosphoenolpyruvate carboxykinase (ATP) OS=Zea mays OX=4577 PE=2 SV=1
Os04g0600300	AOX1B	4.41354	3.69831		0.715228		XP_015633631.1	ubiquinol oxidase 1b, mitochondrial-like [Oryza sativa Japonica Group]	GO:0106292;;GO:0016020;;GO:0009916;;GO:0005739;;GO:0005743;;GO:0043229;;GO:0102721;;GO:0010230;;GO:0070469;;GO:0046872;;GO:0016491	deleted;;cellular_component;;molecular_function;;cellular_component;;cellular_component;;cellular_component;;molecular_function;;biological_process;;cellular_component;;molecular_function;;molecular_function	old GO;;membrane;;alternative oxidase activity;;mitochondrion;;mitochondrial inner membrane;;intracellular organelle;;ubiquinol:oxygen oxidoreductase activity;;alternative respiration;;respiratory chain;;metal ion binding;;oxidoreductase activity	K17893	AOX1, AOX2			ENOG410YFEH	S:Function unknown	PF01786.21;;PF03232.17	AOX;;COQ7	Alternative oxidase;;Ubiquinone biosynthesis protein COQ7	sp|O82766|AOX1B_ORYSJ	Ubiquinol oxidase 1b, mitochondrial OS=Oryza sativa subsp. japonica OX=39947 GN=AOX1B PE=2 SV=1	4336875
Os05g0457800	GPAT	3.01609	2.52817		0.487919		XP_015637896.1	glycerol-3-phosphate acyltransferase 5 [Oryza sativa Japonica Group]	GO:0090447;;GO:0010143;;GO:0016020;;GO:0016746;;GO:0016791	molecular_function;;biological_process;;cellular_component;;molecular_function;;molecular_function	glycerol-3-phosphate 2-O-acyltransferase activity;;cutin biosynthetic process;;membrane;;transferase activity, transferring acyl groups;;phosphatase activity	K13508	GPAT	map00564;;map00561	Glycerophospholipid metabolism;;Glycerolipid metabolism	ENOG410YAYJ	I:Lipid transport and metabolism	PF12710.11;;PF01553.25	HAD;;Acyltransferase	haloacid dehalogenase-like hydrolase;;Acyltransferase	sp|Q9CAY3|GPAT5_ARATH	Glycerol-3-phosphate acyltransferase 5 OS=Arabidopsis thaliana OX=3702 GN=GPAT5 PE=1 SV=1	4338997
Os05g0576600		2.48845	1.5493		0.939157		XP_015638039.1	uncharacterized protein LOC4339695 [Oryza sativa Japonica Group]								ENOG410ZDQD	S:Function unknown						4339695
Os12g0594000	OsWD40-198	2.70208	1.62122		1.08087		BAT17899.1	Os12g0594000 [Oryza sativa Japonica Group]	GO:0016020;;GO:0005515	cellular_component;;molecular_function	membrane;;protein binding					ENOG410YAAP;;ENOG410XP1Z	S:Function unknown;;S:Function unknown	PF00400.36;;PF20426.2	WD40;;NBCH_WD40	WD domain, G-beta repeat;;Neurobeachin beta propeller domain	sp|O48716|JGB_ARATH	Protein JINGUBANG OS=Arabidopsis thaliana OX=3702 GN=JGB PE=1 SV=1
Os04g0401751		3.75187	3.67587		0.0759968		BAS89045.1	Os04g0401700, partial [Oryza sativa Japonica Group]	GO:0006813;;GO:0016020;;GO:0015079;;GO:0005886	biological_process;;cellular_component;;molecular_function;;cellular_component	potassium ion transport;;membrane;;potassium ion transmembrane transporter activity;;plasma membrane	K03549	kup			COG3158	P:Inorganic ion transport and metabolism				sp|Q6VVA6|HAK1_ORYSJ	Potassium transporter 1 OS=Oryza sativa subsp. japonica OX=39947 GN=HAK1 PE=1 SV=2
Os08g0198700	GLO6	1.05049	1.04775		0.00274393		KAB8107702.1	hypothetical protein EE612_042643, partial [Oryza sativa]	GO:0016020;;GO:0005777;;GO:0003973;;GO:0010181;;GO:0051707;;GO:0016491	cellular_component;;cellular_component;;molecular_function;;molecular_function;;biological_process;;molecular_function	membrane;;peroxisome;;(S)-2-hydroxy-acid oxidase activity;;FMN binding;;response to other organism;;oxidoreductase activity	K11517	HAO	map00630;;map04146	Glyoxylate and dicarboxylate metabolism;;Peroxisome	COG1304	C:Energy production and conversion	PF01070.22	FMN_dh	FMN-dependent dehydrogenase	sp|B8AKX6|GLO1_ORYSI	Glycolate oxidase 1 OS=Oryza sativa subsp. indica OX=39946 GN=GLO1 PE=3 SV=1
Os04g0685700		2.28821	2.03494		0.253274		CAD41923.2	OSJNBa0070M12.1 [Oryza sativa Japonica Group]								ENOG4112BY6	S:Function unknown						9267051
Os01g0558700		2.5018	2.15542		0.346381		XP_015622266.1	uncharacterized protein LOC9267897 [Oryza sativa Japonica Group]								ENOG410Z9HU	S:Function unknown						9267897
Os04g0540500		1.55562	1.41418		0.141442		KAB8096290.1	hypothetical protein EE612_024668 [Oryza sativa]	GO:0006355;;GO:0005634;;GO:0016020;;GO:0008270	biological_process;;cellular_component;;cellular_component;;molecular_function	regulation of transcription, DNA-templated;;nucleus;;membrane;;zinc ion binding
Os09g0517200		6.4308	6.14934		0.281461		XP_015612241.1	disease resistance protein Pik-2-like [Oryza sativa Japonica Group]	GO:0006952;;GO:0098542;;GO:0051707;;GO:0043531;;GO:0005524	biological_process;;biological_process;;biological_process;;molecular_function;;molecular_function	defense response;;defense response to other organism;;response to other organism;;ADP binding;;ATP binding					COG4886	S:Function unknown	PF00931.26;;PF18052.5;;PF12799.11;;PF13855.10	NB-ARC;;Rx_N;;LRR_4;;LRR_8	NB-ARC domain;;Rx N-terminal domain;;Leucine Rich repeats (2 copies;;Leucine rich repeat	sp|P0DO07|PIK2_ORYSJ	Disease resistance protein Pik-2 OS=Oryza sativa subsp. japonica OX=39947 GN=PIK-2 PE=3 SV=1	4347587
Os08g0457400	OsRLCK255	2.25852	1.81906		0.439464		XP_015648545.1	serine/threonine-protein kinase RIPK [Oryza sativa Japonica Group]	GO:0016310;;GO:0006468;;GO:0005524;;GO:0004672	biological_process;;biological_process;;molecular_function;;molecular_function	phosphorylation;;protein phosphorylation;;ATP binding;;protein kinase activity					COG0515	T:Signal transduction mechanisms	PF07714.21;;PF00069.29	PK_Tyr_Ser-Thr;;Pkinase	Protein tyrosine and serine/threonine kinase;;Protein kinase domain	sp|Q9ZUF4|RIPK_ARATH	Serine/threonine-protein kinase RIPK OS=Arabidopsis thaliana OX=3702 GN=RIPK PE=1 SV=1	4345755
Os03g0435200		1.19956	1.15123		0.0483327		XP_015617823.1	pentatricopeptide repeat-containing protein At1g43980, mitochondrial [Oryza sativa Japonica Group]	GO:0043231;;GO:0003723;;GO:0009451	cellular_component;;molecular_function;;biological_process	intracellular membrane-bounded organelle;;RNA binding;;RNA modification					ENOG410Z7Z7	S:Function unknown	PF13041.10;;PF01535.24;;PF12854.11;;PF13812.10	PPR_2;;PPR;;PPR_1;;PPR_3	PPR repeat family;;PPR repeat;;PPR repeat;;Pentatricopeptide repeat domain	sp|Q9LP03|PPR73_ARATH	Pentatricopeptide repeat-containing protein At1g43980, mitochondrial OS=Arabidopsis thaliana OX=3702 GN=PCMP-E58 PE=3 SV=1	107275280
Os09g0362800		1.5299	1.1083		0.4216		BAF24902.1	Os09g0362800, partial [Oryza sativa Japonica Group]	GO:0005737;;GO:0004177;;GO:0042277;;GO:0005783;;GO:0016020;;GO:0043171;;GO:0008270;;GO:0070006;;GO:0006508;;GO:0008237;;GO:0043231	cellular_component;;molecular_function;;molecular_function;;cellular_component;;cellular_component;;biological_process;;molecular_function;;molecular_function;;biological_process;;molecular_function;;cellular_component	cytoplasm;;aminopeptidase activity;;peptide binding;;endoplasmic reticulum;;membrane;;peptide catabolic process;;zinc ion binding;;metalloaminopeptidase activity;;proteolysis;;metallopeptidase activity;;intracellular membrane-bounded organelle	K08776	NPEPPS			COG0308	E:Amino acid transport and metabolism	PF11838.12	ERAP1_C	ERAP1-like C-terminal domain	sp|Q6K4E7|APM1D_ORYSJ	Aminopeptidase M1-D OS=Oryza sativa subsp. japonica OX=39947 GN=Os09g0362800 PE=2 SV=1
Os04g0506100		4.75022	4.39167		0.358549		KAB8096014.1	hypothetical protein EE612_024280, partial [Oryza sativa]	GO:0006468;;GO:0016020;;GO:0005524;;GO:0004672	biological_process;;cellular_component;;molecular_function;;molecular_function	protein phosphorylation;;membrane;;ATP binding;;protein kinase activity					COG4886	S:Function unknown	PF07714.21;;PF00069.29	PK_Tyr_Ser-Thr;;Pkinase	Protein tyrosine and serine/threonine kinase;;Protein kinase domain	sp|Q9LVP0|Y5639_ARATH	Probable leucine-rich repeat receptor-like protein kinase At5g63930 OS=Arabidopsis thaliana OX=3702 GN=At5g63930 PE=1 SV=1
Os03g0762500		2.28909	1.66543		0.62366		KAB8093705.1	hypothetical protein EE612_020615, partial [Oryza sativa]	GO:0016020	cellular_component	membrane					ENOG41103ZD	S:Function unknown
Os06g0667000		3.36571	2.72061		0.6451		XP_015642007.1	putative receptor-like protein kinase At3g47110 [Oryza sativa Japonica Group]	GO:0006468;;GO:0016301;;GO:0016310;;GO:0016020;;GO:0000166;;GO:0004674;;GO:0016740;;GO:0004672;;GO:0005524	biological_process;;molecular_function;;biological_process;;cellular_component;;molecular_function;;molecular_function;;molecular_function;;molecular_function;;molecular_function	protein phosphorylation;;kinase activity;;phosphorylation;;membrane;;nucleotide binding;;protein serine/threonine kinase activity;;transferase activity;;protein kinase activity;;ATP binding					COG4886	S:Function unknown	PF00560.37;;PF13855.10;;PF07714.21;;PF00069.29;;PF12799.11;;PF08263.16	LRR_1;;LRR_8;;PK_Tyr_Ser-Thr;;Pkinase;;LRR_4;;LRRNT_2	Leucine Rich Repeat;;Leucine rich repeat;;Protein tyrosine and serine/threonine kinase;;Protein kinase domain;;Leucine Rich repeats (2 copies;;Leucine rich repeat N-terminal domain	sp|Q9SD62|Y3471_ARATH	Putative receptor-like protein kinase At3g47110 OS=Arabidopsis thaliana OX=3702 GN=At3g47110 PE=3 SV=1	4341784
Os01g0606900	OsDjC10	2.58639	1.86922		0.717173		XP_015632931.1	dnaJ homolog subfamily B member 7 [Oryza sativa Japonica Group]	GO:0005783	cellular_component	endoplasmic reticulum					COG0484;;COG2214	O:Posttranslational modification, protein turnover, chaperones;;O:Posttranslational modification, protein turnover, chaperones	PF00226.35	DnaJ	DnaJ domain	sp|Q9QYI7|DNJB8_MOUSE	DnaJ homolog subfamily B member 8 OS=Mus musculus OX=10090 GN=Dnajb8 PE=2 SV=1	4324218
Os07g0406600		1.10584	1.06975		0.0360966		KAB8105103.1	hypothetical protein EE612_038622, partial [Oryza sativa]	GO:0005737;;GO:0009660;;GO:0009590;;GO:0016020;;GO:0009959;;GO:0009705;;GO:0004620;;GO:0046872	cellular_component;;biological_process;;biological_process;;cellular_component;;biological_process;;cellular_component;;molecular_function;;molecular_function	cytoplasm;;amyloplast organization;;detection of gravity;;membrane;;negative gravitropism;;plant-type vacuole membrane;;phospholipase activity;;metal ion binding					ENOG410YDSX	S:Function unknown	PF02862.21	DDHD	DDHD domain	sp|Q8W5R2|SHGR2_ARATH	Phospholipase SGR2 OS=Arabidopsis thaliana OX=3702 GN=SGR2 PE=1 SV=1
Os02g0435400		1.48096	1.0761		0.404855		EEE56887.1	hypothetical protein OsJ_06536 [Oryza sativa Japonica Group]	GO:0016020;;GO:0043229;;GO:0051754;;GO:0004672;;GO:0007094;;GO:0000776	cellular_component;;cellular_component;;biological_process;;molecular_function;;biological_process;;cellular_component	membrane;;intracellular organelle;;meiotic sister chromatid cohesion, centromeric;;protein kinase activity;;mitotic spindle assembly checkpoint;;kinetochore	K02178	BUB1
Os01g0102500		1.54247	1.48136		0.0611053		XP_015622454.1	uncharacterized protein LOC4326468 [Oryza sativa Japonica Group]								ENOG410Z781	S:Function unknown						4326468
Os08g0100300		1.57799	1.50724		0.0707439		KAF2917667.1	hypothetical protein DAI22_08g000200 [Oryza sativa Japonica Group]
Os04g0164300		1.08624	1.02941		0.0568297		BAS87861.1	Os04g0164300, partial [Oryza sativa Japonica Group]	GO:0009579;;GO:0016020;;GO:0009536	cellular_component;;cellular_component;;cellular_component	thylakoid;;membrane;;plastid					ENOG410YKJ1	S:Function unknown
Os03g0622500		1.78497	1.42867		0.356295		BAF12599.1	Os03g0622500, partial [Oryza sativa Japonica Group]	GO:0005737;;GO:0016787;;GO:0005634;;GO:0046872	cellular_component;;molecular_function;;cellular_component;;molecular_function	cytoplasm;;hydrolase activity;;nucleus;;metal ion binding					ENOG411206Y	S:Function unknown
Os11g0672300		1.76593	1.00588		0.760051		NP_001410172.1	cell number regulator 13 [Oryza sativa Japonica Group]	GO:0007166	biological_process	cell surface receptor signaling pathway					ENOG41103Y9	S:Function unknown	PF19584.3;;PF05659.15	MCAfunc;;RPW8	MCAfunc domain;;Arabidopsis broad-spectrum mildew resistance protein RPW8	sp|B6SJQ0|CNR13_MAIZE	Cell number regulator 13 OS=Zea mays OX=4577 GN=CNR13 PE=2 SV=1	4351095
Os05g0552800		2.1223	1.76692		0.35538		XP_015638300.1	uncharacterized protein LOC4339544 [Oryza sativa Japonica Group]								ENOG410YRN3;;ENOG4111CSR	S:Function unknown;;S:Function unknown	PF14009.10	PADRE	PADRE domain			4339544
Os02g0571100	OsCPS2	8.37021	6.65473		1.71549		XP_015625954.1	ent-copalyl diphosphate synthase 2 [Oryza sativa Japonica Group]	GO:0009536;;GO:0016853;;GO:0046872;;GO:0010333;;GO:0000287;;GO:0009686;;GO:0009685;;GO:0006952;;GO:0009905;;GO:0016102;;GO:0016114;;GO:0016829;;GO:0009507	cellular_component;;molecular_function;;molecular_function;;molecular_function;;molecular_function;;biological_process;;biological_process;;biological_process;;molecular_function;;biological_process;;biological_process;;molecular_function;;cellular_component	plastid;;isomerase activity;;metal ion binding;;terpene synthase activity;;magnesium ion binding;;gibberellin biosynthetic process;;gibberellin metabolic process;;defense response;;ent-copalyl diphosphate synthase activity;;diterpenoid biosynthetic process;;terpenoid biosynthetic process;;lyase activity;;chloroplast	K04120	E5.5.1.13	map00904	Diterpenoid biosynthesis	ENOG410XNXR	I:Lipid transport and metabolism	PF01397.25	Terpene_synth	Terpene synthase, N-terminal domain	sp|Q6Z5I0|CPS2_ORYSJ	Ent-copalyl diphosphate synthase 2, chloroplastic OS=Oryza sativa subsp. japonica OX=39947 GN=CPS2 PE=1 SV=1	9266189
Os12g0631600		2.70846	1.40823		1.30023		XP_015618306.1	uncharacterized protein LOC4352864 [Oryza sativa Japonica Group]								ENOG41103X1	S:Function unknown						4352864
Os01g0768333	OsSAUR2	4.17093	3.71732		0.453607		XP_015642731.1	auxin-responsive protein SAUR71 [Oryza sativa Japonica Group]	GO:0009733;;GO:0016020	biological_process;;cellular_component	response to auxin;;membrane					ENOG4111I51;;ENOG410Z91T	S:Function unknown;;S:Function unknown	PF02519.18	Auxin_inducible	Auxin responsive protein	sp|Q9SA49|SAU41_ARATH	Auxin-responsive protein SAUR41 OS=Arabidopsis thaliana OX=3702 GN=SAUR41 PE=2 SV=1	9272536
Os12g0491800	OsKSL10	8.74795	6.77182		1.97613		NP_001391661.1	ent-sandaracopimara-8(14),15-diene synthase, chloroplastic [Oryza sativa Japonica Group]	GO:0009536;;GO:0010333;;GO:0000287;;GO:0006952;;GO:0034280;;GO:0016102;;GO:0046872;;GO:0016829;;GO:0009507	cellular_component;;molecular_function;;molecular_function;;biological_process;;molecular_function;;biological_process;;molecular_function;;molecular_function;;cellular_component	plastid;;terpene synthase activity;;magnesium ion binding;;defense response;;ent-sandaracopimaradiene synthase activity;;diterpenoid biosynthetic process;;metal ion binding;;lyase activity;;chloroplast	K14037	KSL10	map00904	Diterpenoid biosynthesis			PF03936.20;;PF01397.25;;PF19086.4	Terpene_synth_C;;Terpene_synth;;Terpene_syn_C_2	Terpene synthase family, metal binding domain;;Terpene synthase, N-terminal domain;;Terpene synthase family 2, C-terminal metal binding	sp|Q2QQJ5|KSL10_ORYSJ	Ent-sandaracopimara-8(14),15-diene synthase, chloroplastic OS=Oryza sativa subsp. japonica OX=39947 GN=KSL10 PE=1 SV=2	4352248
Os02g0582600		2.02214	1.44043		0.581716		XP_015623993.1	heavy metal-associated isoprenylated plant protein 41 [Oryza sativa Japonica Group]	GO:0046872	molecular_function	metal ion binding					ENOG41106V9	S:Function unknown				sp|F2VYU4|PIK1_ORYSJ	Disease resistance protein Pik-1 OS=Oryza sativa subsp. japonica OX=39947 GN=PIK-1 PE=1 SV=1	4329795
Os06g0133500		2.95471	2.32262		0.63209		XP_052158170.1	uncharacterized protein LOC127775897 [Oryza glaberrima]								ENOG41106KF	S:Function unknown
Os05g0432200		5.39288	3.8801		1.51278		XP_015638298.1	gibberellin-regulated protein 2 [Oryza sativa Japonica Group]								ENOG410YT52	S:Function unknown	PF02704.18	GASA	Gibberellin regulated protein	sp|P46688|GASA2_ARATH	Gibberellin-regulated protein 2 OS=Arabidopsis thaliana OX=3702 GN=GASA2 PE=2 SV=1	4338883
Os10g0501500		2.41077	2.13786		0.272906		XP_015614173.1	calcium uniporter protein 2, mitochondrial [Oryza sativa Japonica Group]	GO:1990246;;GO:0016020;;GO:0015292;;GO:0006811;;GO:0005262;;GO:0070588;;GO:0006816;;GO:0005739;;GO:0036444;;GO:0005743;;GO:0034220;;GO:0051560	cellular_component;;cellular_component;;molecular_function;;biological_process;;molecular_function;;biological_process;;biological_process;;cellular_component;;biological_process;;cellular_component;;biological_process;;biological_process	uniplex complex;;membrane;;uniporter activity;;ion transport;;calcium channel activity;;calcium ion transmembrane transport;;calcium ion transport;;mitochondrion;;calcium ion transmembrane import into mitochondrion;;mitochondrial inner membrane;;ion transmembrane transport;;mitochondrial calcium ion homeostasis	K20858	MCU			ENOG410Y3YU	S:Function unknown	PF04678.17	MCU	Mitochondrial calcium uniporter	sp|O64823|MCU2_ARATH	Calcium uniporter protein 2, mitochondrial OS=Arabidopsis thaliana OX=3702 GN=At2g23790 PE=2 SV=1	4349038
Os03g0187550		2.99619	1.82708		1.16911		KAF2937699.1	hypothetical protein DAI22_03g068300 [Oryza sativa Japonica Group]								ENOG410YBXM	S:Function unknown				sp|Q9SE96|GEML1_ARATH	GEM-like protein 1 OS=Arabidopsis thaliana OX=3702 GN=FIP1 PE=1 SV=1
Os02g0570500	Oscyp71Z6	3.56048	2.54386		1.01662		NP_001403616.1	ent-isokaurene C2/C3-hydroxylase [Oryza sativa Japonica Group]	GO:0004497;;GO:0016020;;GO:0020037;;GO:0016705;;GO:0036201;;GO:0005506;;GO:0046872;;GO:0016102;;GO:0016491	molecular_function;;cellular_component;;molecular_function;;molecular_function;;molecular_function;;molecular_function;;molecular_function;;biological_process;;molecular_function	monooxygenase activity;;membrane;;heme binding;;oxidoreductase activity, acting on paired donors, with incorporation or reduction of molecular oxygen;;ent-isokaurene C2-hydroxylase activity;;iron ion binding;;metal ion binding;;diterpenoid biosynthetic process;;oxidoreductase activity	K21291;K16083	CYP71Z7;CYP71Z6	map00904	Diterpenoid biosynthesis	COG2124	Q:Secondary metabolites biosynthesis, transport and catabolism	PF00067.26	p450	Cytochrome P450	sp|A3A871|C71Z6_ORYSJ	Ent-isokaurene C2/C3-hydroxylase OS=Oryza sativa subsp. japonica OX=39947 GN=CYP71Z6 PE=1 SV=1
Os01g0138400		4.08834	3.84845		0.239887		XP_015621741.1	LEAF RUST 10 DISEASE-RESISTANCE LOCUS RECEPTOR-LIKE PROTEIN KINASE-like 2.1 [Oryza sativa Japonica Group]	GO:0006468;;GO:0016301;;GO:0016310;;GO:0016020;;GO:0030247;;GO:0000166;;GO:0004674;;GO:0016740;;GO:0004672;;GO:0005524	biological_process;;molecular_function;;biological_process;;cellular_component;;molecular_function;;molecular_function;;molecular_function;;molecular_function;;molecular_function;;molecular_function	protein phosphorylation;;kinase activity;;phosphorylation;;membrane;;polysaccharide binding;;nucleotide binding;;protein serine/threonine kinase activity;;transferase activity;;protein kinase activity;;ATP binding					COG0515	T:Signal transduction mechanisms	PF07714.21;;PF00069.29;;PF13947.10;;PF14380.10	PK_Tyr_Ser-Thr;;Pkinase;;GUB_WAK_bind;;WAK_assoc	Protein tyrosine and serine/threonine kinase;;Protein kinase domain;;Wall-associated receptor kinase galacturonan-binding;;Wall-associated receptor kinase C-terminal	sp|F4HQ23|LRL27_ARATH	LEAF RUST 10 DISEASE-RESISTANCE LOCUS RECEPTOR-LIKE PROTEIN KINASE-like 2.7 OS=Arabidopsis thaliana OX=3702 GN=LRK10L-2.7 PE=3 SV=3	4325681
Os12g0141000		4.3305	3.72637		0.604126		XP_052138279.1	uncharacterized protein LOC127756932 [Oryza glaberrima]	GO:0016020	cellular_component	membrane					COG0666	S:Function unknown	PF13962.10	PGG	Domain of unknown function
Os04g0179100	OsSDR110C-MS2	9.0014	7.02414		1.97725		BAS87951.1	Os04g0179100, partial [Oryza sativa Japonica Group]	GO:0019290;;GO:0102960;;GO:0008667;;GO:0016616	biological_process;;molecular_function;;molecular_function;;molecular_function	siderophore biosynthetic process;;momilactone-A synthase activity;;2,3-dihydro-2,3-dihydroxybenzoate dehydrogenase activity;;oxidoreductase activity, acting on the CH-OH group of donors, NAD or NADP as acceptor	K13070	MAS	map00904	Diterpenoid biosynthesis	COG1028	S:Function unknown	PF13561.10	adh_short_C2	Enoyl-(Acyl carrier protein) reductase	sp|Q7FAE1|MOMAS_ORYSJ	Momilactone A synthase OS=Oryza sativa subsp. japonica OX=39947 GN=Os04g0179200 PE=2 SV=1
Os04g0679150	OsRLCK172	7.41165	6.26488		1.14678		NP_001406909.1	clathrin light chain 1 [Oryza sativa Japonica Group]	GO:0030130;;GO:0006886;;GO:0030132;;GO:0016192;;GO:0005198	cellular_component;;biological_process;;cellular_component;;biological_process;;molecular_function	clathrin coat of trans-Golgi network vesicle;;intracellular protein transport;;clathrin coat of coated pit;;vesicle-mediated transport;;structural molecule activity					ENOG410YMJV;;ENOG410YB93	U:Intracellular trafficking, secretion, and vesicular transport;;U:Intracellular trafficking, secretion, and vesicular transport				sp|Q7XKE9|CLC1_ORYSJ	Clathrin light chain 1 OS=Oryza sativa subsp. japonica OX=39947 GN=Os04g0679100 PE=2 SV=1
Os03g0152000		1.6822	1.5973		0.0849024		XP_015628852.1	heavy metal-associated isoprenylated plant protein 6 [Oryza sativa Japonica Group]	GO:0046872	molecular_function	metal ion binding					COG2608	S:Function unknown	PF00403.30;;PF12242.12	HMA;;Eno-Rase_NADH_b	Heavy-metal-associated domain;;NAD(P)H binding domain of trans-2-enoyl-CoA reductase	sp|Q9SJL2|HIP5_ARATH	Heavy metal-associated isoprenylated plant protein 5 OS=Arabidopsis thaliana OX=3702 GN=HIPP05 PE=1 SV=2	4331647
Os03g0407900	OsRLCK110	2.60983	1.91437		0.695467		XP_015627789.1	serine/threonine-protein kinase RIPK [Oryza sativa Japonica Group]	GO:0006468;;GO:0016310;;GO:0016301;;GO:0004674;;GO:0004672;;GO:0005524	biological_process;;biological_process;;molecular_function;;molecular_function;;molecular_function;;molecular_function	protein phosphorylation;;phosphorylation;;kinase activity;;protein serine/threonine kinase activity;;protein kinase activity;;ATP binding					COG0515	T:Signal transduction mechanisms	PF07714.21;;PF00069.29	PK_Tyr_Ser-Thr;;Pkinase	Protein tyrosine and serine/threonine kinase;;Protein kinase domain	sp|Q9ZUF4|RIPK_ARATH	Serine/threonine-protein kinase RIPK OS=Arabidopsis thaliana OX=3702 GN=RIPK PE=1 SV=1	4333082

## Sheet: Table S5
Table S5 List of common differentially expressed genes synergistically downregulated by melatonin and nano-zero valent iron (Cd vs Cd-nZVI and Cd vs Cd-MT-nZVI) in O.sativa leaves under Cd containated and Se enriched paddy soil.
Gene ID	Gene Name	Cd_MT_nZVI_vs_Cd_fc(Cd_MT_nZVI/Cd)	Cd_nZVI_vs_Cd_fc(Cd_nZVI/Cd)		C-D		NR Hit-name	NR Description	GO ID	GO Term	GO Description	KO ID	KO Name	Pathway ID	Pathway Definition	EggNOG	EggNOG Description	Pfam ID	Domain	Domain Description	Swiss-Prot Hit-name	Swiss-Prot Description	Entrez
Os04g0530600	OsTRX	0.430937	0.222991		0.207946		NP_001406630.1	thioredoxin M2, chloroplastic [Oryza sativa Japonica Group]	GO:0005737;;GO:0009536;;GO:0016671;;GO:0009507;;GO:0015035;;GO:0016491	cellular_component;;cellular_component;;molecular_function;;cellular_component;;molecular_function;;molecular_function	cytoplasm;;plastid;;oxidoreductase activity, acting on a sulfur group of donors, disulfide as acceptor;;chloroplast;;protein disulfide oxidoreductase activity;;oxidoreductase activity	K03671	TXN, trxA			COG0526	O:Posttranslational modification, protein turnover, chaperones	PF00085.24;;PF14595.10;;PF13098.10;;PF13192.10	Thioredoxin;;Thioredoxin_9;;Thioredoxin_2;;Thioredoxin_3	Thioredoxin;;Thioredoxin;;Thioredoxin-like domain;;Thioredoxin domain	sp|Q7X8R5|TRXM2_ORYSJ	Thioredoxin M2, chloroplastic OS=Oryza sativa subsp. japonica OX=39947 GN=Os04g0530600 PE=2 SV=2	4336484
Os05g0549100	OsSTN7	0.495342	0.400823		0.0945191		XP_015639436.1	serine/threonine-protein kinase STN7, chloroplastic [Oryza sativa Japonica Group]	GO:0006468;;GO:0007623;;GO:0042651;;GO:0016310;;GO:0016301;;GO:0042548;;GO:0000166;;GO:0004674;;GO:0016740;;GO:0004672;;GO:0009643;;GO:0005524;;GO:0009507	biological_process;;biological_process;;cellular_component;;biological_process;;molecular_function;;biological_process;;molecular_function;;molecular_function;;molecular_function;;molecular_function;;biological_process;;molecular_function;;cellular_component	protein phosphorylation;;circadian rhythm;;thylakoid membrane;;phosphorylation;;kinase activity;;regulation of photosynthesis, light reaction;;nucleotide binding;;protein serine/threonine kinase activity;;transferase activity;;protein kinase activity;;photosynthetic acclimation;;ATP binding;;chloroplast					ENOG410XPP3	T:Signal transduction mechanisms	PF00069.29;;PF07714.21	Pkinase;;PK_Tyr_Ser-Thr	Protein kinase domain;;Protein tyrosine and serine/threonine kinase	sp|Q9S713|STT7_ARATH	Serine/threonine-protein kinase STN7, chloroplastic OS=Arabidopsis thaliana OX=3702 GN=STN7 PE=1 SV=1	4339518
Os11g0549900		0.399424	0.347711		0.0517134		ABA94185.2	expressed protein [Oryza sativa Japonica Group]	GO:0016020	cellular_component	membrane					ENOG4111ZKX	S:Function unknown						9272501
Os05g0365000		0.470023	0.288892		0.181131		XP_015637798.1	phytochrome A-associated F-box protein [Oryza sativa Japonica Group]	GO:0010099;;GO:0005634;;GO:0009585;;GO:0048573;;GO:0048366	biological_process;;cellular_component;;biological_process;;biological_process;;biological_process	regulation of photomorphogenesis;;nucleus;;red, far-red light phototransduction;;photoperiodism, flowering;;leaf development					ENOG410Y9MI	S:Function unknown				sp|Q8LEA8|EID1_ARATH	Phytochrome A-associated F-box protein OS=Arabidopsis thaliana OX=3702 GN=EID1 PE=1 SV=2	9272149
Os04g0657300		0.485687	0.31146		0.174226		XP_015634051.1	farnesyl pyrophosphate synthase 2 [Oryza sativa Japonica Group]	GO:0016765;;GO:0008299;;GO:0016740	molecular_function;;biological_process;;molecular_function	transferase activity, transferring alkyl or aryl (other than methyl) groups;;isoprenoid biosynthetic process;;transferase activity	K00787	FDPS	map00900	Terpenoid backbone biosynthesis	COG0142	H:Coenzyme transport and metabolism	PF00348.21	polyprenyl_synt	Polyprenyl synthetase	sp|P49353|FPPS_MAIZE	Farnesyl pyrophosphate synthase OS=Zea mays OX=4577 GN=FPS PE=2 SV=1	4337261
Os05g0170950	OsPPT4	0.439169	0.180875		0.258294		KAB8098302.1	hypothetical protein EE612_027399, partial [Oryza sativa]	GO:0031969;;GO:0005794;;GO:0015297;;GO:0015718;;GO:0016020;;GO:0015121;;GO:0015605;;GO:0015120;;GO:0046943	cellular_component;;cellular_component;;molecular_function;;biological_process;;cellular_component;;molecular_function;;molecular_function;;molecular_function;;molecular_function	chloroplast membrane;;Golgi apparatus;;antiporter activity;;monocarboxylic acid transport;;membrane;;phosphoenolpyruvate:phosphate antiporter activity;;organophosphate ester transmembrane transporter activity;;phosphoglycerate transmembrane transporter activity;;carboxylic acid transmembrane transporter activity	K15283	SLC35E1			ENOG410XP1S	S:Function unknown	PF03151.20;;PF00892.24	TPT;;EamA	Triose-phosphate Transporter family;;EamA-like transporter family	sp|Q5VQL3|PPT3_ORYSJ	Phosphoenolpyruvate/phosphate translocator 3, chloroplastic OS=Oryza sativa subsp. japonica OX=39947 GN=PPT3 PE=2 SV=1
Os03g0750100		0.38736	0.200304		0.187056		KAB8093591.1	hypothetical protein EE612_020452 [Oryza sativa]	GO:0009579;;GO:0009536;;GO:0006457;;GO:0030544;;GO:0005634;;GO:0043229;;GO:0051879	cellular_component;;cellular_component;;biological_process;;molecular_function;;cellular_component;;cellular_component;;molecular_function	thylakoid;;plastid;;protein folding;;Hsp70 protein binding;;nucleus;;intracellular organelle;;Hsp90 protein binding	K24927	TTC4, CNS1			COG0457	S:Function unknown	PF18972.4;;PF14559.10;;PF13428.10	Wheel;;TPR_19;;TPR_14	Cns1/TTC4 Wheel domain;;Tetratricopeptide repeat;;Tetratricopeptide repeat	sp|Q54M20|TTC4_DICDI	Tetratricopeptide repeat protein 4 homolog OS=Dictyostelium discoideum OX=44689 GN=ttc4 PE=3 SV=1
Os03g0840200		0.482618	0.331565		0.151054		XP_015632697.1	uncharacterized protein LOC4334728 [Oryza sativa Japonica Group]								COG0823	U:Intracellular trafficking, secretion, and vesicular transport	PF07676.16;;PF00930.25	PD40;;DPPIV_N	WD40-like Beta Propeller Repeat;;Dipeptidyl peptidase IV (DPP IV) N-terminal region			4334728
Os11g0707000	OsRcaII	0.35287	0.12871		0.22416		ABG22614.1	Ribulose bisphosphate carboxylase/oxygenase activase, chloroplast precursor, putative, expressed [Oryza sativa Japonica Group]	GO:0009536;;GO:0009570;;GO:0000166;;GO:0016887;;GO:0046863;;GO:0005524;;GO:0009507	cellular_component;;cellular_component;;molecular_function;;molecular_function;;molecular_function;;molecular_function;;cellular_component	plastid;;chloroplast stroma;;nucleotide binding;;ATPase activity;;ribulose-1,5-bisphosphate carboxylase/oxygenase activator activity;;ATP binding;;chloroplast					COG1222	O:Posttranslational modification, protein turnover, chaperones	PF21228.1;;PF00004.33	RuBisCO_activase_AAA_helical;;AAA	Ribulose bisphosphate carboxylase/oxygenase activase, AAA, helical;;ATPase family associated with various cellular activities (AAA	sp|P93431|RCA_ORYSJ	Ribulose bisphosphate carboxylase/oxygenase activase, chloroplastic OS=Oryza sativa subsp. japonica OX=39947 GN=RCA PE=1 SV=2
Os08g0500800		0.428964	0.279995		0.148969		XP_015649680.1	uncharacterized protein LOC4345952 [Oryza sativa Japonica Group]								ENOG4111W00	S:Function unknown	PF08325.14;;PF09409.14	WLM;;PUB	WLM domain;;PUB domain	sp|O94580|WSS2_SCHPO	DNA-dependent metalloprotease WSS1 homolog 2 OS=Schizosaccharomyces pombe (strain 972 / ATCC 24843) OX=284812 GN=wss2 PE=1 SV=1	4345952
Os05g0586600	OsSIG5	0.192401	0.110054		0.0823463		XP_015637716.1	RNA polymerase sigma factor sigE, chloroplastic/mitochondrial [Oryza sativa Japonica Group]	GO:0009536;;GO:0003700;;GO:0016987;;GO:0006355;;GO:2000142;;GO:0006352;;GO:0003677;;GO:0003899	cellular_component;;molecular_function;;molecular_function;;biological_process;;biological_process;;biological_process;;molecular_function;;molecular_function	plastid;;transcription factor activity, sequence-specific DNA binding;;sigma factor activity;;regulation of transcription, DNA-templated;;regulation of DNA-templated transcription, initiation;;DNA-templated transcription, initiation;;DNA binding;;DNA-directed RNA polymerase activity	K03093	sigI			COG0568	K:Transcription	PF04539.20;;PF04542.18;;PF04545.20	Sigma70_r3;;Sigma70_r2;;Sigma70_r4	Sigma-70 region 3;;Sigma-70 region 2;;Sigma-70, region 4	sp|Q9ZNX9|SIGE_ARATH	RNA polymerase sigma factor sigE, chloroplastic/mitochondrial OS=Arabidopsis thaliana OX=3702 GN=SIGE PE=1 SV=1	4339759
Os03g0704100		0.464949	0.435115		0.0298336		KAB8093198.1	hypothetical protein EE612_019919, partial [Oryza sativa]								ENOG4111HBZ	S:Function unknown	PF04755.16	PAP_fibrillin	PAP_fibrillin	sp|Q9LU85|PAP4_ARATH	Probable plastid-lipid-associated protein 4, chloroplastic OS=Arabidopsis thaliana OX=3702 GN=PAP4 PE=1 SV=1
Os07g0613500		0.485472	0.481653		0.00381885		XP_015647254.1	serine/threonine-protein kinase RIPK [Oryza sativa Japonica Group]	GO:0016310;;GO:0006468;;GO:0016301;;GO:0005524;;GO:0004672	biological_process;;biological_process;;molecular_function;;molecular_function;;molecular_function	phosphorylation;;protein phosphorylation;;kinase activity;;ATP binding;;protein kinase activity					COG0515	T:Signal transduction mechanisms	PF07714.21;;PF00069.29	PK_Tyr_Ser-Thr;;Pkinase	Protein tyrosine and serine/threonine kinase;;Protein kinase domain	sp|Q9ZUF4|RIPK_ARATH	Serine/threonine-protein kinase RIPK OS=Arabidopsis thaliana OX=3702 GN=RIPK PE=1 SV=1	4343886
Os10g0560400	OsCCT35	0.24481	0.0830584		0.161752		XP_015613219.1	transcription factor GHD7-like [Oryza sativa Japonica Group]	GO:2000028;;GO:0005634;;GO:0009909;;GO:0005515	biological_process;;cellular_component;;biological_process;;molecular_function	regulation of photoperiodism, flowering;;nucleus;;regulation of flower development;;protein binding					ENOG411051M	S:Function unknown	PF06203.18	CCT	CCT motif	sp|E5RQA1|GHD7_ORYSJ	Transcription factor GHD7 OS=Oryza sativa subsp. japonica OX=39947 GN=GHD7 PE=1 SV=1	4349376
Os03g0100200		0.314092	0.183856		0.130236		XP_015628426.1	probable pterin-4-alpha-carbinolamine dehydratase, chloroplastic [Oryza sativa Japonica Group]	GO:0006729;;GO:0008124;;GO:0016829;;GO:0009536	biological_process;;molecular_function;;molecular_function;;cellular_component	tetrahydrobiopterin biosynthetic process;;4-alpha-hydroxytetrahydrobiopterin dehydratase activity;;lyase activity;;plastid					ENOG4111XUM	S:Function unknown	PF01329.23	Pterin_4a	Pterin 4 alpha carbinolamine dehydratase	sp|Q9LU63|ATP1_ARATH	Probable pterin-4-alpha-carbinolamine dehydratase, chloroplastic OS=Arabidopsis thaliana OX=3702 GN=ATP1 PE=1 SV=1	107277382
Os10g0567800	OsDRP1C	0.497618	0.46863		0.0289888		XP_015614939.1	dynamin-related protein 1E [Oryza sativa Japonica Group]	GO:0005737;;GO:0008017;;GO:0016020;;GO:0003924;;GO:0000166;;GO:0005874;;GO:0005525	cellular_component;;molecular_function;;cellular_component;;molecular_function;;molecular_function;;cellular_component;;molecular_function	cytoplasm;;microtubule binding;;membrane;;GTPase activity;;nucleotide binding;;microtubule;;GTP binding					COG0699	S:Function unknown	PF01031.24;;PF00350.27;;PF02212.22	Dynamin_M;;Dynamin_N;;GED	Dynamin central region;;Dynamin family;;Dynamin GTPase effector domain	sp|Q9FNX5|DRP1E_ARATH	Phragmoplastin DRP1E OS=Arabidopsis thaliana OX=3702 GN=DRP1E PE=1 SV=1	4349436
Os06g0682900	HSA32	0.197448	0.11713		0.0803184		XP_015641330.1	protein HEAT-STRESS-ASSOCIATED 32 [Oryza sativa Japonica Group]	GO:0009408;;GO:0010286;;GO:0010608	biological_process;;biological_process;;biological_process	response to heat;;heat acclimation;;posttranscriptional regulation of gene expression					COG1809	S:Function unknown	PF02679.19	ComA	(2R)-phospho-3-sulfolactate synthase (ComA	sp|Q8GWL1|HSA32_ARATH	Protein HEAT-STRESS-ASSOCIATED 32 OS=Arabidopsis thaliana OX=3702 GN=HSA32 PE=2 SV=1	4341866
Os05g0112800		0.130231	0.0483552		0.0818753		XP_015637598.1	cysteine-rich repeat secretory protein 55 [Oryza sativa Japonica Group]								ENOG41103MB	S:Function unknown	PF01657.21	Stress-antifung	Salt stress response/antifungal	sp|Q9LV60|CRR55_ARATH	Cysteine-rich repeat secretory protein 55 OS=Arabidopsis thaliana OX=3702 GN=CRRSP55 PE=2 SV=1	4337600
Os01g0898800		0.411354	0.173118		0.238236		XP_015621523.1	uncharacterized protein LOC4325113 [Oryza sativa Japonica Group]								ENOG410Z7Z7	S:Function unknown	PF07939.15	DUF1685	Protein of unknown function (DUF1685			4325113
Os05g0456925		0.305564	0.246847		0.0587179		XP_015637698.1	ultraviolet-B receptor UVR8 isoform X3 [Oryza sativa Japonica Group]								COG5184;;COG5184	D:Cell cycle control, cell division, chromosome partitioning;;Z:Cytoskeleton	PF00415.22;;PF13540.10	RCC1;;RCC1_2	Regulator of chromosome condensation (RCC1) repeat;;Regulator of chromosome condensation (RCC1) repeat	sp|Q9FN03|UVR8_ARATH	Ultraviolet-B receptor UVR8 OS=Arabidopsis thaliana OX=3702 GN=UVR8 PE=1 SV=1	107275700
Os05g0475700	OsMFS3	0.187112	0.0765766		0.110536		XP_015638076.1	protein NUCLEAR FUSION DEFECTIVE 4 [Oryza sativa Japonica Group]	GO:0016020	cellular_component	membrane					ENOG410Y90Q	S:Function unknown	PF06813.17	Nodulin-like	Nodulin-like	sp|F4I9E1|NFD4_ARATH	Protein NUCLEAR FUSION DEFECTIVE 4 OS=Arabidopsis thaliana OX=3702 GN=NFD4 PE=3 SV=1	4339096
Os04g0444800	OsFRO7	0.315934	0.0825476		0.233386		NP_001406286.1	ferric reduction oxidase 7, chloroplastic [Oryza sativa Japonica Group]	GO:0000293;;GO:0016491;;GO:0016020;;GO:0005886	molecular_function;;molecular_function;;cellular_component;;cellular_component	ferric-chelate reductase activity;;oxidoreductase activity;;membrane;;plasma membrane	K00521	E1.16.1.7			ENOG410XNZY	U:Intracellular trafficking, secretion, and vesicular transport	PF01794.23;;PF08022.16;;PF08030.16;;PF00175.25	Ferric_reduct;;FAD_binding_8;;NAD_binding_6;;NAD_binding_1	Ferric reductase like transmembrane component;;FAD-binding domain;;Ferric reductase NAD binding domain;;Oxidoreductase NAD-binding domain	sp|Q3KTM0|FRO7_ARATH	Ferric reduction oxidase 7, chloroplastic OS=Arabidopsis thaliana OX=3702 GN=FRO7 PE=2 SV=1	4335953
Os05g0148700		0.465468	0.346453		0.119016		NP_001389413.1	senescence-associated protein OSA15, chloroplastic [Oryza sativa Japonica Group]	GO:0010150;;GO:0034599;;GO:0009536;;GO:0009507	biological_process;;biological_process;;cellular_component;;cellular_component	leaf senescence;;cellular response to oxidative stress;;plastid;;chloroplast					ENOG4111KY0	S:Function unknown				sp|Q65XF2|OSA15_ORYSJ	Senescence-associated protein OSA15, chloroplastic OS=Oryza sativa subsp. japonica OX=39947 GN=OSA15 PE=1 SV=1	4337812
Os11g0173900		0.105772	0.0732535		0.0325182		AAX93042.1	hypothetical protein [Oryza sativa Japonica Group]	GO:0006468;;GO:0016310;;GO:0016020;;GO:0004674;;GO:0004672;;GO:0005524	biological_process;;biological_process;;cellular_component;;molecular_function;;molecular_function;;molecular_function	protein phosphorylation;;phosphorylation;;membrane;;protein serine/threonine kinase activity;;protein kinase activity;;ATP binding					COG4886	S:Function unknown	PF13855.10;;PF00560.37;;PF07714.21;;PF00069.29;;PF12799.11;;PF08263.16	LRR_8;;LRR_1;;PK_Tyr_Ser-Thr;;Pkinase;;LRR_4;;LRRNT_2	Leucine rich repeat;;Leucine Rich Repeat;;Protein tyrosine and serine/threonine kinase;;Protein kinase domain;;Leucine Rich repeats (2 copies;;Leucine rich repeat N-terminal domain	sp|C0LGP4|Y3475_ARATH	Probable LRR receptor-like serine/threonine-protein kinase At3g47570 OS=Arabidopsis thaliana OX=3702 GN=At3g47570 PE=2 SV=1
Os03g0228200		0.333888	0.137917		0.195971		XP_015630866.1	uncharacterized protein At1g01500 [Oryza sativa Japonica Group]	GO:0016020;;GO:0004617	cellular_component;;molecular_function	membrane;;phosphoglycerate dehydrogenase activity					ENOG410YD6W	S:Function unknown				sp|Q8GUH2|Y1015_ARATH	Uncharacterized protein At1g01500 OS=Arabidopsis thaliana OX=3702 GN=At1g01500 PE=2 SV=1	4332137
Os05g0407100		0.0653161	0.0131018		0.0522143		KAB8099394.1	hypothetical protein EE612_029417 [Oryza sativa]	GO:0005615	cellular_component	extracellular space					ENOG410ZFCR	S:Function unknown	PF04419.18	SERF-like_N	Small EDRK-rich factor 1/2-like, N-terminal
Os06g0699600	OsCCT25	0.493635	0.210031		0.283605		XP_015644406.1	protein CHLOROPLAST IMPORT APPARATUS 2 [Oryza sativa Japonica Group]	GO:0006355;;GO:0005634;;GO:0006508;;GO:0005515;;GO:0004252	biological_process;;cellular_component;;biological_process;;molecular_function;;molecular_function	regulation of transcription, DNA-templated;;nucleus;;proteolysis;;protein binding;;serine-type endopeptidase activity					COG5641	K:Transcription	PF06203.18	CCT	CCT motif	sp|Q9LU68|CIA2_ARATH	Protein CHLOROPLAST IMPORT APPARATUS 2 OS=Arabidopsis thaliana OX=3702 GN=CIA2 PE=1 SV=1	4341958
Os03g0684400	OsMRS2-6	0.428394	0.281373		0.147021		NP_001405411.1	magnesium transporter MRS2-A, chloroplastic [Oryza sativa Japonica Group]	GO:0031969;;GO:0009941;;GO:0009536;;GO:0006811;;GO:0016020;;GO:0055085;;GO:1903830;;GO:0015693;;GO:0046873;;GO:0030001;;GO:0010117;;GO:0010960;;GO:0010027;;GO:0015095;;GO:0009507	cellular_component;;cellular_component;;cellular_component;;biological_process;;cellular_component;;biological_process;;biological_process;;biological_process;;molecular_function;;biological_process;;biological_process;;biological_process;;biological_process;;molecular_function;;cellular_component	chloroplast membrane;;chloroplast envelope;;plastid;;ion transport;;membrane;;transmembrane transport;;magnesium ion transmembrane transport;;magnesium ion transport;;metal ion transmembrane transporter activity;;metal ion transport;;photoprotection;;magnesium ion homeostasis;;thylakoid membrane organization;;magnesium ion transmembrane transporter activity;;chloroplast	K16075	MRS2, MFM1			ENOG410XNNZ	U:Intracellular trafficking, secretion, and vesicular transport	PF01544.22	CorA	CorA-like Mg2+ transporter protein	sp|B8APK3|MRS2A_ORYSI	Magnesium transporter MRS2-A, chloroplastic OS=Oryza sativa subsp. indica OX=39946 GN=MRS2-A PE=3 SV=1	4333741
Os08g0525600	OsFKBP62a	0.439486	0.393827		0.0456593		XP_015650117.1	70 kDa peptidyl-prolyl isomerase [Oryza sativa Japonica Group]	GO:0005737;;GO:0009579;;GO:0000413;;GO:0009536;;GO:0003755;;GO:0043229;;GO:0005515;;GO:0061077;;GO:0016853	cellular_component;;cellular_component;;biological_process;;cellular_component;;molecular_function;;cellular_component;;molecular_function;;biological_process;;molecular_function	cytoplasm;;thylakoid;;protein peptidyl-prolyl isomerization;;plastid;;peptidyl-prolyl cis-trans isomerase activity;;intracellular organelle;;protein binding;;chaperone-mediated protein folding;;isomerase activity	K09571	FKBP4_5			COG0545	O:Posttranslational modification, protein turnover, chaperones	PF00254.32;;PF00515.32;;PF07719.21;;PF14559.10;;PF13181.10;;PF13424.10;;PF13432.10;;PF13371.10	FKBP_C;;TPR_1;;TPR_2;;TPR_19;;TPR_8;;TPR_12;;TPR_16;;TPR_9	FKBP-type peptidyl-prolyl cis-trans isomerase;;Tetratricopeptide repeat;;Tetratricopeptide repeat;;Tetratricopeptide repeat;;Tetratricopeptide repeat;;Tetratricopeptide repeat;;Tetratricopeptide repeat;;Tetratricopeptide repeat	sp|Q43207|FKB70_WHEAT	70 kDa peptidyl-prolyl isomerase OS=Triticum aestivum OX=4565 GN=FKBP70 PE=1 SV=1	4346090
Os11g0216100		0.373925	0.256112		0.117813		KAB8114679.1	hypothetical protein EE612_054229, partial [Oryza sativa]	GO:0009535;;GO:0010598;;GO:0016020;;GO:0005783;;GO:0009507	cellular_component;;cellular_component;;cellular_component;;cellular_component;;cellular_component	chloroplast thylakoid membrane;;NAD(P)H dehydrogenase complex (plastoquinone;;membrane;;endoplasmic reticulum;;chloroplast	K23051	ndhT			COG0484	O:Posttranslational modification, protein turnover, chaperones	PF00226.35	DnaJ	DnaJ domain	sp|Q9SMS0|NDHT_ARATH	NAD(P)H-quinone oxidoreductase subunit T, chloroplastic OS=Arabidopsis thaliana OX=3702 GN=ndhT PE=1 SV=1
Os04g0423600	OsSET18	0.378588	0.266176		0.112412		KAF2933989.1	hypothetical protein DAI22_04g128600 [Oryza sativa Japonica Group]	GO:0005515	molecular_function	protein binding					ENOG410YN9S	S:Function unknown	PF00856.32	SET	SET domain	sp|Q3ECY6|SDG41_ARATH	Protein SET DOMAIN GROUP 41 OS=Arabidopsis thaliana OX=3702 GN=SDG41 PE=2 SV=1
Os03g0859700	OsCPn60alpha2	0.255461	0.231363		0.0240973		AAO72600.1	putative chaperonin 60 alpha subunit, partial [Oryza sativa Japonica Group]	GO:0042026;;GO:0140662;;GO:0006457;;GO:0005524;;GO:0000166	biological_process;;deleted;;biological_process;;molecular_function;;molecular_function	protein refolding;;old GO;;protein folding;;ATP binding;;nucleotide binding					COG0459	O:Posttranslational modification, protein turnover, chaperones	PF00118.28	Cpn60_TCP1	TCP-1/cpn60 chaperonin family	sp|P08823|RUBA_WHEAT	RuBisCO large subunit-binding protein subunit alpha, chloroplastic (Fragment) OS=Triticum aestivum OX=4565 PE=1 SV=1
Os09g0553900		0.267468	0.0883748		0.179093		XP_015611845.1	protein PLASTID MOVEMENT IMPAIRED 1 [Oryza sativa Japonica Group]								ENOG410Y932	S:Function unknown	PF21745.1;;PF10358.13	PMI1_PMIR1-2_C;;NT-C2	PMI1/PMIR1-2, C-terminal domain;;N-terminal C2 in EEIG1 and EHBP1 proteins	sp|Q9C8E6|PMI1_ARATH	Protein PLASTID MOVEMENT IMPAIRED 1 OS=Arabidopsis thaliana OX=3702 GN=PMI1 PE=1 SV=1	4347805
Os09g0346500	CAB1R	0.478983	0.217688		0.261295		NP_001390670.1	chlorophyll a-b binding protein 1, chloroplastic [Oryza sativa Japonica Group]	GO:0009535;;GO:0009579;;GO:0016168;;GO:0009536;;GO:0009522;;GO:0009523;;GO:0016020;;GO:0015979;;GO:0009768;;GO:0009416;;GO:0046872;;GO:0009765;;GO:0009507	cellular_component;;cellular_component;;molecular_function;;cellular_component;;cellular_component;;cellular_component;;cellular_component;;biological_process;;biological_process;;biological_process;;molecular_function;;biological_process;;cellular_component	chloroplast thylakoid membrane;;thylakoid;;chlorophyll binding;;plastid;;photosystem I;;photosystem II;;membrane;;photosynthesis;;photosynthesis, light harvesting in photosystem I;;response to light stimulus;;metal ion binding;;photosynthesis, light harvesting;;chloroplast	K08912	LHCB1	map00196	Photosynthesis - antenna proteins	ENOG410ZHBU	J:Translation, ribosomal structure and biogenesis	PF00504.25	Chloroa_b-bind	Chlorophyll A-B binding protein	sp|P12330|CB21_ORYSJ	Chlorophyll a-b binding protein 1, chloroplastic OS=Oryza sativa subsp. japonica OX=39947 GN=CAB1R PE=2 SV=2	4346803
Os04g0624600	SSIIIB	0.307558	0.293291		0.014267		XP_015636215.1	starch synthase 3, chloroplastic/amyloplastic [Oryza sativa Japonica Group]	GO:0004373;;GO:2001070;;GO:0016740;;GO:0016757;;GO:0009501;;GO:0009507;;GO:0019252	molecular_function;;molecular_function;;molecular_function;;molecular_function;;cellular_component;;cellular_component;;biological_process	glycogen (starch) synthase activity;;starch binding;;transferase activity;;transferase activity, transferring glycosyl groups;;amyloplast;;chloroplast;;starch biosynthetic process	K00703	glgA	map00500	Starch and sucrose metabolism	COG0297	G:Carbohydrate transport and metabolism	PF08323.15;;PF16760.9;;PF13439.10;;PF00534.24;;PF13579.10	Glyco_transf_5;;CBM53;;Glyco_transf_4;;Glycos_transf_1;;Glyco_trans_4_4	Starch synthase catalytic domain;;Starch/carbohydrate-binding module (family 53;;Glycosyltransferase Family 4;;Glycosyl transferases group 1;;Glycosyl transferase 4-like domain	sp|A0A0P0XCU3|SSY3A_ORYSJ	Soluble starch synthase 3a, chloroplastic/amyloplastic OS=Oryza sativa subsp. japonica OX=39947 GN=SSIIIA PE=1 SV=2	4337056
Os01g0281100		0.332945	0.163984		0.16896		NP_001395919.1	uncharacterized LOC4326913 isoform 1 [Oryza sativa Japonica Group]	GO:0006355;;GO:0007623	biological_process;;biological_process	regulation of transcription, DNA-templated;;circadian rhythm					ENOG410Z9PA	S:Function unknown						4326913
Os07g0546000	IPI	0.459686	0.430918		0.0287676		XP_015646798.1	isopentenyl-diphosphate Delta-isomerase I [Oryza sativa Japonica Group]	GO:0005737;;GO:0015995;;GO:0016853;;GO:0009240;;GO:0008299;;GO:0004452;;GO:0003743;;GO:0050992	cellular_component;;biological_process;;molecular_function;;biological_process;;biological_process;;molecular_function;;molecular_function;;biological_process	cytoplasm;;chlorophyll biosynthetic process;;isomerase activity;;isopentenyl diphosphate biosynthetic process;;isoprenoid biosynthetic process;;isopentenyl-diphosphate delta-isomerase activity;;translation initiation factor activity;;dimethylallyl diphosphate biosynthetic process	K01823	idi, IDI	map00900	Terpenoid backbone biosynthesis	COG1443	I:Lipid transport and metabolism	PF00293.32	NUDIX	NUDIX domain	sp|O48964|IDI1_CAMAC	Isopentenyl-diphosphate Delta-isomerase I OS=Camptotheca acuminata OX=16922 GN=IPI1 PE=2 SV=1	4343523
Os02g0102900	OsCPn60beta2	0.446101	0.244127		0.201974		XP_015626534.1	ruBisCO large subunit-binding protein subunit beta, chloroplastic [Oryza sativa Japonica Group]	GO:0006457;;GO:0008289;;GO:0000166;;GO:0140662;;GO:0042026;;GO:0005524	biological_process;;molecular_function;;molecular_function;;deleted;;biological_process;;molecular_function	protein folding;;lipid binding;;nucleotide binding;;old GO;;protein refolding;;ATP binding	K04077	groEL, HSPD1	map03018	RNA degradation	COG0459	O:Posttranslational modification, protein turnover, chaperones	PF00118.28	Cpn60_TCP1	TCP-1/cpn60 chaperonin family	sp|P08927|RUBB_PEA	RuBisCO large subunit-binding protein subunit beta, chloroplastic OS=Pisum sativum OX=3888 PE=1 SV=2	4327993
Os03g0757000		0.483178	0.395728		0.0874498		BAF13234.2	Os03g0757000, partial [Oryza sativa Japonica Group]	GO:0035251;;GO:0008194	molecular_function;;molecular_function	UDP-glucosyltransferase activity;;UDP-glycosyltransferase activity					COG1819	S:Function unknown				sp|Q9SGA8|U83A1_ARATH	UDP-glycosyltransferase 83A1 OS=Arabidopsis thaliana OX=3702 GN=UGT83A1 PE=2 SV=1
Os03g0387900		0.422847	0.212103		0.210744		XP_015631349.1	protein LNK1 isoform X1 [Oryza sativa Japonica Group]	GO:0006355;;GO:0007623	biological_process;;biological_process	regulation of transcription, DNA-templated;;circadian rhythm					ENOG410YS2X	S:Function unknown				sp|A8MQN2|LNK1_ARATH	Protein LNK1 OS=Arabidopsis thaliana OX=3702 GN=LNK1 PE=1 SV=1	4333004
Os01g0179800		0.393129	0.308711		0.0844173		XP_052156723.1	uncharacterized protein LOC127774501 isoform X1 [Oryza glaberrima]	GO:0016020	cellular_component	membrane	K23544	SERINC1			ENOG410XP7K	S:Function unknown	PF03348.19	Serinc	Serine incorporator (Serinc	sp|Q54UF8|SERIC_DICDI	Probable serine incorporator OS=Dictyostelium discoideum OX=44689 GN=serinc PE=3 SV=1	4325348
Os12g0189300		0.185472	0.032246		0.153226		BAF29352.1	Os12g0189300 [Oryza sativa Japonica Group]	GO:0003824	molecular_function	catalytic activity					COG2513	G:Carbohydrate transport and metabolism	PF13714.10;;PF00463.25	PEP_mutase;;ICL	Phosphoenolpyruvate phosphomutase;;Isocitrate lyase family	sp|O49290|CPPM_ARATH	Carboxyvinyl-carboxyphosphonate phosphorylmutase, chloroplastic OS=Arabidopsis thaliana OX=3702 GN=At1g77060 PE=1 SV=2
Os05g0512200		0.330875	0.226121		0.104754		XP_015637623.1	uncharacterized protein LOC4339294 [Oryza sativa Japonica Group]								ENOG410XNS0	S:Function unknown	PF14234.10	DUF4336	Domain of unknown function (DUF4336			4339294
Os11g0118300		0.437429	0.0324757		0.404953		BAT12429.1	Os11g0118300, partial [Oryza sativa Japonica Group]	GO:0016567	biological_process	protein ubiquitination					ENOG410YAX9	S:Function unknown	PF03000.18	NPH3	NPH3 family	sp|Q682S0|RPT2_ARATH	Root phototropism protein 2 OS=Arabidopsis thaliana OX=3702 GN=RPT2 PE=1 SV=2
Os09g0438700		0.474335	0.429551		0.0447846		XP_015651171.1	20 kDa chaperonin, chloroplastic [Oryza sativa Japonica Group]	GO:0009536;;GO:0006457;;GO:0046914;;GO:0051085;;GO:0051087;;GO:0044183;;GO:0051290;;GO:0051082;;GO:0009409;;GO:0140662;;GO:1901671;;GO:0005759;;GO:0009788;;GO:0046872;;GO:0005524;;GO:0009507	cellular_component;;biological_process;;molecular_function;;biological_process;;molecular_function;;molecular_function;;biological_process;;molecular_function;;biological_process;;deleted;;biological_process;;cellular_component;;biological_process;;molecular_function;;molecular_function;;cellular_component	plastid;;protein folding;;transition metal ion binding;;chaperone mediated protein folding requiring cofactor;;chaperone binding;;protein binding involved in protein folding;;protein heterotetramerization;;unfolded protein binding;;response to cold;;old GO;;positive regulation of superoxide dismutase activity;;mitochondrial matrix;;negative regulation of abscisic acid-activated signaling pathway;…	K04078	groES, HSPE1			COG0234	O:Posttranslational modification, protein turnover, chaperones	PF00166.25	Cpn10	Chaperonin 10 Kd subunit	sp|O65282|CH20_ARATH	20 kDa chaperonin, chloroplastic OS=Arabidopsis thaliana OX=3702 GN=CPN20 PE=1 SV=2	4347161
Os02g0782300	OsDjC23	0.454398	0.387497		0.0669009		EEE57923.1	hypothetical protein OsJ_08621 [Oryza sativa Japonica Group]	GO:0005783	cellular_component	endoplasmic reticulum					COG0484;;COG2214	O:Posttranslational modification, protein turnover, chaperones;;O:Posttranslational modification, protein turnover, chaperones				sp|Q6PGY5|DJC21_DANRE	DnaJ homolog subfamily C member 21 OS=Danio rerio OX=7955 GN=dnajc21 PE=2 SV=1
Os02g0491400	OsFKBP62c	0.176905	0.0903827		0.0865227		XP_015627346.1	70 kDa peptidyl-prolyl isomerase [Oryza sativa Japonica Group]	GO:0005737;;GO:0009579;;GO:0000413;;GO:0009536;;GO:0003755;;GO:0016020;;GO:0043229;;GO:0005515;;GO:0061077;;GO:0016853	cellular_component;;cellular_component;;biological_process;;cellular_component;;molecular_function;;cellular_component;;cellular_component;;molecular_function;;biological_process;;molecular_function	cytoplasm;;thylakoid;;protein peptidyl-prolyl isomerization;;plastid;;peptidyl-prolyl cis-trans isomerase activity;;membrane;;intracellular organelle;;protein binding;;chaperone-mediated protein folding;;isomerase activity	K01802	E5.2.1.8			COG0545	O:Posttranslational modification, protein turnover, chaperones	PF00254.32;;PF00515.32;;PF07719.21;;PF13181.10;;PF14559.10	FKBP_C;;TPR_1;;TPR_2;;TPR_8;;TPR_19	FKBP-type peptidyl-prolyl cis-trans isomerase;;Tetratricopeptide repeat;;Tetratricopeptide repeat;;Tetratricopeptide repeat;;Tetratricopeptide repeat	sp|Q43207|FKB70_WHEAT	70 kDa peptidyl-prolyl isomerase OS=Triticum aestivum OX=4565 GN=FKBP70 PE=1 SV=1	4329388
Os06g0116800	OsDjA9	0.358662	0.321856		0.0368056		XP_015643217.1	chaperone protein dnaJ GFA2, mitochondrial [Oryza sativa Japonica Group]	GO:0005737;;GO:0006457;;GO:0000740;;GO:0031072;;GO:0009558;;GO:0005739;;GO:0010197;;GO:0042026;;GO:0051082;;GO:0051085;;GO:0009408;;GO:0046872;;GO:0010198;;GO:0005524;;GO:0005783	cellular_component;;biological_process;;biological_process;;molecular_function;;biological_process;;cellular_component;;biological_process;;biological_process;;molecular_function;;biological_process;;biological_process;;molecular_function;;biological_process;;molecular_function;;cellular_component	cytoplasm;;protein folding;;nuclear membrane fusion;;heat shock protein binding;;embryo sac cellularization;;mitochondrion;;polar nucleus fusion;;protein refolding;;unfolded protein binding;;chaperone mediated protein folding requiring cofactor;;response to heat;;metal ion binding;;synergid death;;ATP binding;;endoplasmic reticulum	K03686	dnaJ			COG0484	O:Posttranslational modification, protein turnover, chaperones	PF01556.22;;PF00226.35;;PF00684.23	DnaJ_C;;DnaJ;;DnaJ_CXXCXGXG	DnaJ C terminal domain;;DnaJ domain;;DnaJ central domain	sp|Q8GWW8|GFA2_ARATH	Chaperone protein dnaJ GFA2, mitochondrial OS=Arabidopsis thaliana OX=3702 GN=GFA2 PE=2 SV=1	4339933
Os08g0138900		0.376359	0.141897		0.234462		XP_015649817.1	uncharacterized protein LOC4344630 [Oryza sativa Japonica Group]								ENOG4110810	S:Function unknown						4344630
Os04g0576800		0.455098	0.370374		0.0847233		NP_001389341.1	polyprenol reductase 1 [Oryza sativa Japonica Group]	GO:0016491;;GO:0044238;;GO:0006629;;GO:0006486;;GO:0006488;;GO:0019408;;GO:0016627;;GO:0016020;;GO:0102389;;GO:0005789;;GO:0071704;;GO:0016095;;GO:0003865;;GO:0005783	molecular_function;;biological_process;;biological_process;;biological_process;;biological_process;;biological_process;;molecular_function;;cellular_component;;molecular_function;;cellular_component;;biological_process;;biological_process;;molecular_function;;cellular_component	oxidoreductase activity;;primary metabolic process;;lipid metabolic process;;protein glycosylation;;dolichol-linked oligosaccharide biosynthetic process;;dolichol biosynthetic process;;oxidoreductase activity, acting on the CH-CH group of donors;;membrane;;polyprenol reductase activity;;endoplasmic reticulum membrane;;organic substance metabolic process;;polyprenol catabolic process;;3-oxo-5-alph…	K12345	SRD5A3	map00510	N-Glycan biosynthesis	ENOG4111JQM	S:Function unknown	PF02544.20	Steroid_dh	3-oxo-5-alpha-steroid 4-dehydrogenase	sp|A2XWN6|POED1_ORYSI	Polyprenol reductase 1 OS=Oryza sativa subsp. indica OX=39946 GN=OsI_17065 PE=3 SV=1	4336740
Os03g0192500	OsBIPP2C1	0.333724	0.160385		0.173338		NP_001404233.1	probable protein phosphatase 2C BIPP2C1 isoform 1 [Oryza sativa Japonica Group]	GO:0016787;;GO:0046872;;GO:0004722;;GO:0004721;;GO:0017018	molecular_function;;molecular_function;;molecular_function;;molecular_function;;molecular_function	hydrolase activity;;metal ion binding;;protein serine/threonine phosphatase activity;;phosphoprotein phosphatase activity;;myosin phosphatase activity					COG0631	T:Signal transduction mechanisms	PF00481.25;;PF13672.10;;PF07228.16	PP2C;;PP2C_2;;SpoIIE	Protein phosphatase 2C;;Protein phosphatase 2C;;Stage II sporulation protein E (SpoIIE	sp|Q10QL5|BIP2C_ORYSJ	Probable protein phosphatase 2C BIPP2C1 OS=Oryza sativa subsp. japonica OX=39947 GN=BIPP2C1 PE=2 SV=1	4331915
Os11g0110066		0.493585	0.468717		0.0248681		XP_015617227.1	RNA-directed DNA methylation 4 [Oryza sativa Japonica Group]								ENOG410ZJRU	S:Function unknown				sp|Q8GYP3|RDM4_ARATH	RNA-directed DNA methylation 4 OS=Arabidopsis thaliana OX=3702 GN=RDM4 PE=1 SV=1	4349576
Os01g0804400		0.248655	0.12169		0.126965		XP_015624649.1	cytochrome P450 94B3 [Oryza sativa Japonica Group]	GO:0004497;;GO:0016020;;GO:0020037;;GO:0016705;;GO:0005506;;GO:0046872;;GO:0016491	molecular_function;;cellular_component;;molecular_function;;molecular_function;;molecular_function;;molecular_function;;molecular_function	monooxygenase activity;;membrane;;heme binding;;oxidoreductase activity, acting on paired donors, with incorporation or reduction of molecular oxygen;;iron ion binding;;metal ion binding;;oxidoreductase activity					COG2124	Q:Secondary metabolites biosynthesis, transport and catabolism	PF00067.26	p450	Cytochrome P450	sp|A0A517FNC7|94D18_PARPY	Cytochrome P450 CYP94D108 OS=Paris polyphylla OX=49666 GN=CYP94D108 PE=1 SV=1	4327539
Os09g0526600	HSFB2C	0.234403	0.0858431		0.14856		XP_015612526.1	heat stress transcription factor B-2c isoform X3 [Oryza sativa Japonica Group]	GO:0043565;;GO:0003700;;GO:0005634;;GO:0006355;;GO:0006357;;GO:0003677;;GO:0000978	molecular_function;;molecular_function;;cellular_component;;biological_process;;biological_process;;molecular_function;;molecular_function	sequence-specific DNA binding;;transcription factor activity, sequence-specific DNA binding;;nucleus;;regulation of transcription, DNA-templated;;regulation of transcription from RNA polymerase II promoter;;DNA binding;;RNA polymerase II core promoter proximal region sequence-specific DNA binding	K09419	HSFF			COG5169	K:Transcription	PF00447.21	HSF_DNA-bind	HSF-type DNA-binding	sp|Q652B0|HFB2C_ORYSJ	Heat stress transcription factor B-2c OS=Oryza sativa subsp. japonica OX=39947 GN=HSFB2C PE=2 SV=1	4347637
Os12g0514500		0.464142	0.43108		0.0330623		XP_015620006.1	heat shock protein 90-6, mitochondrial [Oryza sativa Japonica Group]	GO:0006457;;GO:0005783;;GO:0009570;;GO:0005829;;GO:0005739;;GO:0000166;;GO:0050821;;GO:0140662;;GO:0051082;;GO:0016887;;GO:0005886;;GO:0032991;;GO:0048471;;GO:0034605;;GO:0005524	biological_process;;cellular_component;;cellular_component;;cellular_component;;cellular_component;;molecular_function;;biological_process;;deleted;;molecular_function;;molecular_function;;cellular_component;;cellular_component;;cellular_component;;biological_process;;molecular_function	protein folding;;endoplasmic reticulum;;chloroplast stroma;;cytosol;;mitochondrion;;nucleotide binding;;protein stabilization;;old GO;;unfolded protein binding;;ATPase activity;;plasma membrane;;macromolecular complex;;perinuclear region of cytoplasm;;cellular response to heat;;ATP binding	K09487	HSP90B, TRA1	map04626;;map04141	Plant-pathogen interaction;;Protein processing in endoplasmic reticulum	COG0326	O:Posttranslational modification, protein turnover, chaperones	PF00183.22;;PF13589.10;;PF02518.30	HSP90;;HATPase_c_3;;HATPase_c	Hsp90 protein;;Histidine kinase-, DNA gyrase B-, and HSP90-like ATPase;;Histidine kinase-, DNA gyrase B-, and HSP90-like ATPase	sp|F4JFN3|HS906_ARATH	Heat shock protein 90-6, mitochondrial OS=Arabidopsis thaliana OX=3702 GN=HSP90-6 PE=1 SV=1	4352339
Os03g0731900	OsHDR	0.442476	0.289294		0.153182		NP_001389176.1	4-hydroxy-3-methylbut-2-enyl diphosphate reductase, chloroplastic [Oryza sativa Japonica Group]	GO:0009536;;GO:0051539;;GO:0009570;;GO:0051536;;GO:0050992;;GO:0019288;;GO:0046872;;GO:0008299;;GO:0009507;;GO:0051745;;GO:0016491	cellular_component;;molecular_function;;cellular_component;;molecular_function;;biological_process;;biological_process;;molecular_function;;biological_process;;cellular_component;;molecular_function;;molecular_function	plastid;;4 iron, 4 sulfur cluster binding;;chloroplast stroma;;iron-sulfur cluster binding;;dimethylallyl diphosphate biosynthetic process;;isopentenyl diphosphate biosynthetic process, methylerythritol 4-phosphate pathway;;metal ion binding;;isoprenoid biosynthetic process;;chloroplast;;4-hydroxy-3-methylbut-2-en-1-yl diphosphate reductase activity;;oxidoreductase activity	K03527	ispH, lytB	map00900	Terpenoid backbone biosynthesis	COG0761	I:Lipid transport and metabolism	PF02401.22	LYTB	LytB protein	sp|Q6AVG6|ISPH_ORYSJ	4-hydroxy-3-methylbut-2-enyl diphosphate reductase, chloroplastic OS=Oryza sativa subsp. japonica OX=39947 GN=ISPH PE=2 SV=1	4334003
Os01g0352100		0.360429	0.299342		0.0610873		XP_015642279.1	protein SRG1 isoform X1 [Oryza sativa Japonica Group]	GO:0046872;;GO:0016491	molecular_function;;molecular_function	metal ion binding;;oxidoreductase activity					COG3491	S:Function unknown	PF03171.24;;PF14226.10	2OG-FeII_Oxy;;DIOX_N	2OG-Fe(II) oxygenase superfamily;;non-haem dioxygenase in morphine synthesis N-terminal	sp|Q94LP4|ODD11_ORYSJ	2-oxoglutarate-dependent dioxygenase 11 OS=Oryza sativa subsp. japonica OX=39947 GN=2ODD11 PE=1 SV=1	4326482
Os10g0465700	OsSTA246	0.297847	0.212947		0.0849		XP_025876615.1	beta-amylase 1, chloroplastic-like [Oryza sativa Japonica Group]	GO:0016161;;GO:0009507;;GO:0102229;;GO:0000272	molecular_function;;cellular_component;;molecular_function;;biological_process	beta-amylase activity;;chloroplast;;amylopectin maltohydrolase activity;;polysaccharide catabolic process	K01177	E3.2.1.2	map00500	Starch and sucrose metabolism	ENOG410XRH5	S:Function unknown	PF01373.21	Glyco_hydro_14	Glycosyl hydrolase family 14	sp|Q9AV88|BAMY1_ORYSJ	Beta-amylase 1, chloroplastic OS=Oryza sativa subsp. japonica OX=39947 GN=BAMY1 PE=1 SV=1
Os01g0892600		0.482573	0.283169		0.199404		XP_052137460.1	pectin acetylesterase 6-like [Oryza glaberrima]	GO:0016787;;GO:0016020;;GO:0052793;;GO:0071555;;GO:0005576;;GO:0009505	molecular_function;;cellular_component;;molecular_function;;biological_process;;cellular_component;;cellular_component	hydrolase activity;;membrane;;pectin acetylesterase activity;;cell wall organization;;extracellular region;;plant-type cell wall	K19882	NOTUM			ENOG410XQKD	S:Function unknown	PF03283.17	PAE	Pectinacetylesterase	sp|Q9SR22|PAE5_ARATH	Pectin acetylesterase 5 OS=Arabidopsis thaliana OX=3702 GN=PAE5 PE=2 SV=1	4324955
Os05g0574400		0.478474	0.337482		0.140991		XP_015639465.1	malate dehydrogenase, mitochondrial [Oryza sativa Japonica Group]	GO:0005737;;GO:0016615;;GO:0016616;;GO:0005739;;GO:0009505;;GO:0003824;;GO:0006099;;GO:0030060;;GO:0019752;;GO:0006108;;GO:0016491	cellular_component;;molecular_function;;molecular_function;;cellular_component;;cellular_component;;molecular_function;;biological_process;;molecular_function;;biological_process;;biological_process;;molecular_function	cytoplasm;;malate dehydrogenase activity;;oxidoreductase activity, acting on the CH-OH group of donors, NAD or NADP as acceptor;;mitochondrion;;plant-type cell wall;;catalytic activity;;tricarboxylic acid cycle;;L-malate dehydrogenase activity;;carboxylic acid metabolic process;;malate metabolic process;;oxidoreductase activity	K00026	MDH2	map00020;;map00630;;map00620;;map00710;;map00270	Citrate cycle (TCA cycle;;Glyoxylate and dicarboxylate metabolism;;Pyruvate metabolism;;Carbon fixation in photosynthetic organisms;;Cysteine and methionine metabolism	COG0039	C:Energy production and conversion	PF00056.27;;PF02866.22;;PF01073.23	Ldh_1_N;;Ldh_1_C;;3Beta_HSD	lactate/malate dehydrogenase, NAD binding domain;;lactate/malate dehydrogenase, alpha/beta C-terminal domain;;3-beta hydroxysteroid dehydrogenase/isomerase family	sp|P17783|MDHM_CITLA	Malate dehydrogenase, mitochondrial OS=Citrullus lanatus OX=3654 GN=MMDH PE=1 SV=1	4339682
Os01g0757500		0.353931	0.190139		0.163792		XP_015649363.1	calcyclin-binding protein [Oryza sativa Japonica Group]	GO:0005737;;GO:0015631;;GO:0031625;;GO:0044548;;GO:0005634;;GO:0006950	cellular_component;;molecular_function;;molecular_function;;molecular_function;;cellular_component;;biological_process	cytoplasm;;tubulin binding;;ubiquitin protein ligase binding;;S100 protein binding;;nucleus;;response to stress	K04507	CACYBP, SIP			ENOG410XSB6	S:Function unknown	PF04969.20;;PF09032.15	CS;;Siah-Interact_N	CS domain;;Siah interacting protein, N terminal	sp|Q3T168|CYBP_BOVIN	Calcyclin-binding protein OS=Bos taurus OX=9913 GN=CACYBP PE=2 SV=1	4325302
Os07g0633200		0.31677	0.260718		0.0560517		EEC82509.1	hypothetical protein OsI_26989 [Oryza sativa Indica Group]	GO:0005737;;GO:0016607;;GO:0003676;;GO:0000398;;GO:0003723	cellular_component;;cellular_component;;molecular_function;;biological_process;;molecular_function	cytoplasm;;nuclear speck;;nucleic acid binding;;mRNA splicing, via spliceosome;;RNA binding	K12900	SRSF10, FUSIP1	map03040	Spliceosome	COG0724;;ENOG41122ZB	S:Function unknown;;S:Function unknown	PF00076.26	RRM_1	RNA recognition motif	sp|Q9SEU4|SRC33_ARATH	Serine/arginine-rich SC35-like splicing factor SCL33 OS=Arabidopsis thaliana OX=3702 GN=SCL33 PE=1 SV=1	4344009
Os01g0700100	OsSWEET2b	0.102318	0.0278082		0.0745094		NP_001395931.1	bidirectional sugar transporter SWEET2b [Oryza sativa Japonica Group]	GO:0051119;;GO:0016020;;GO:0008643;;GO:0005886;;GO:0034219;;GO:0042802	molecular_function;;cellular_component;;biological_process;;cellular_component;;biological_process;;molecular_function	sugar transmembrane transporter activity;;membrane;;carbohydrate transport;;plasma membrane;;carbohydrate transmembrane transport;;identical protein binding	K15382	SLC50A, SWEET			ENOG4111M4R	U:Intracellular trafficking, secretion, and vesicular transport	PF03083.20	MtN3_slv	Sugar efflux transporter for intercellular exchange	sp|B8A833|SWT2B_ORYSI	Bidirectional sugar transporter SWEET2b OS=Oryza sativa subsp. indica OX=39946 GN=SWEET2B PE=3 SV=1	4326923

## Sheet: Table S6
Table S6 List of common differentially expressed genes synergistically upregulated by melatonin and nano-zero valent iron (Cd vs Cd-nZVI and Cd vs Cd-MT-nZVI) in O.sativa leaves under Cd containated and Se enriched paddy soil involved in KEGG pathways .
Gene ID	Gene Name	Cd_MT_nZVI_vs_Cd_log2fc(Cd_MT_nZVI/Cd)	Cd_nZVI_vs_Cd_log2fc(Cd_nZVI/Cd)		C-D		NR Hit-name	NR Description	GO ID	GO Term	GO Description	KO ID	KO Name	Pathway ID	Pathway Definition	EggNOG	EggNOG Description	Pfam ID	Domain	Domain Description	Swiss-Prot Hit-name	Swiss-Prot Description	Entrez
Os07g0190000	OsDXS	5.52113	5.228		0.293126		NP_001408943.1	1-deoxy-D-xylulose-5-phosphate synthase 2, chloroplastic [Oryza sativa Japonica Group]	GO:0052865;;GO:0009536;;GO:0009228;;GO:0046872;;GO:0008661;;GO:0016740;;GO:0003824;;GO:0008299;;GO:0016744;;GO:0016114;;GO:0009507	biological_process;;cellular_component;;biological_process;;molecular_function;;molecular_function;;molecular_function;;molecular_function;;biological_process;;molecular_function;;biological_process;;cellular_component	1-deoxy-D-xylulose 5-phosphate biosynthetic process;;plastid;;thiamine biosynthetic process;;metal ion binding;;1-deoxy-D-xylulose-5-phosphate synthase activity;;transferase activity;;catalytic activity;;isoprenoid biosynthetic process;;transferase activity, transferring aldehyde or ketonic groups;;terpenoid biosynthetic process;;chloroplast	K01662	dxs	map00730;;map00900	Thiamine metabolism;;Terpenoid backbone biosynthesis	COG1154	H:Coenzyme transport and metabolism	PF13292.10;;PF02779.28;;PF02780.24;;PF00676.24;;PF02775.25	DXP_synthase_N;;Transket_pyr;;Transketolase_C;;E1_dh;;TPP_enzyme_C	1-deoxy-D-xylulose-5-phosphate synthase;;Transketolase, pyrimidine binding domain;;Transketolase, C-terminal domain;;Dehydrogenase E1 component;;Thiamine pyrophosphate enzyme, C-terminal TPP binding domain	sp|Q6YU51|DXS2_ORYSJ	Probable 1-deoxy-D-xylulose-5-phosphate synthase 2, chloroplastic OS=Oryza sativa subsp. japonica OX=39947 GN=Os07g0190000 PE=2 SV=1	4342614
Os04g0178300	OsCPS4	6.01714	3.42357		2.59357		NP_001389265.1	syn-copalyl diphosphate synthase, chloroplastic isoform 1 [Oryza sativa Japonica Group]	GO:0009536;;GO:0016853;;GO:0051498;;GO:0010333;;GO:0000287;;GO:0009686;;GO:0006952;;GO:0016102;;GO:0046872;;GO:0016829;;GO:0009507	cellular_component;;molecular_function;;molecular_function;;molecular_function;;molecular_function;;biological_process;;biological_process;;biological_process;;molecular_function;;molecular_function;;cellular_component	plastid;;isomerase activity;;syn-copalyl diphosphate synthase activity;;terpene synthase activity;;magnesium ion binding;;gibberellin biosynthetic process;;defense response;;diterpenoid biosynthetic process;;metal ion binding;;lyase activity;;chloroplast	K14043	CPS4	map00904	Diterpenoid biosynthesis	ENOG410XNXR	I:Lipid transport and metabolism	PF01397.25	Terpene_synth	Terpene synthase, N-terminal domain	sp|Q0JF02|CPS4_ORYSJ	Syn-copalyl diphosphate synthase, chloroplastic OS=Oryza sativa subsp. japonica OX=39947 GN=CPS4 PE=1 SV=1	4335090
Os04g0518100	OsPAL02	1.297	1.25138		0.0456224		XP_015635507.1	phenylalanine ammonia-lyase-like [Oryza sativa Japonica Group]	GO:0005737;;GO:0016841;;GO:0006559;;GO:0016829;;GO:0009800;;GO:0003824;;GO:0045548;;GO:0009698	cellular_component;;molecular_function;;biological_process;;molecular_function;;biological_process;;molecular_function;;molecular_function;;biological_process	cytoplasm;;ammonia-lyase activity;;L-phenylalanine catabolic process;;lyase activity;;cinnamic acid biosynthetic process;;catalytic activity;;phenylalanine ammonia-lyase activity;;phenylpropanoid metabolic process	K13064	PTAL	map00940;;map00360	Phenylpropanoid biosynthesis;;Phenylalanine metabolism	COG2986	E:Amino acid transport and metabolism	PF00221.23	Lyase_aromatic	Aromatic amino acid lyase	sp|P14717|PAL1_ORYSJ	Phenylalanine ammonia-lyase OS=Oryza sativa subsp. japonica OX=39947 GN=PAL PE=1 SV=2	9271676
Os02g0643800	OsSAUR11	2.97009	2.27103		0.699057		XP_015623733.1	auxin-responsive protein SAUR36 [Oryza sativa Japonica Group]	GO:0009733	biological_process	response to auxin	K14488	SAUR	map04075	Plant hormone signal transduction	ENOG410YVYP	S:Function unknown	PF02519.18	Auxin_inducible	Auxin responsive protein	sp|O22150|SAU36_ARATH	Auxin-responsive protein SAUR36 OS=Arabidopsis thaliana OX=3702 GN=SAUR36 PE=2 SV=1	4330132
Os12g0434400		8.023	5.8682		2.1548		XP_015619002.1	putative leucine aminopeptidase 1 [Oryza sativa Japonica Group]	GO:0005737;;GO:0019538;;GO:0030145;;GO:0070006;;GO:0006508;;GO:0008233;;GO:0046872;;GO:0009507	cellular_component;;biological_process;;molecular_function;;molecular_function;;biological_process;;molecular_function;;molecular_function;;cellular_component	cytoplasm;;protein metabolic process;;manganese ion binding;;metalloaminopeptidase activity;;proteolysis;;peptidase activity;;metal ion binding;;chloroplast	K01255	CARP, pepA	map00480	Glutathione metabolism	COG0260	E:Amino acid transport and metabolism	PF00883.25;;PF02789.21	Peptidase_M17;;Peptidase_M17_N	Cytosol aminopeptidase family, catalytic domain;;Cytosol aminopeptidase family, N-terminal domain	sp|Q2QSB9|AMPL1_ORYSJ	Putative leucine aminopeptidase 1 OS=Oryza sativa subsp. japonica OX=39947 GN=Os12g0434400 PE=3 SV=2
Os10g0204300		1.74498	1.34243		0.402556		KAF2912939.1	hypothetical protein DAI22_10g050100 [Oryza sativa Japonica Group]	GO:0016310;;GO:0005829;;GO:0016301;;GO:0004612;;GO:0005524;;GO:0006094	biological_process;;cellular_component;;molecular_function;;molecular_function;;molecular_function;;biological_process	phosphorylation;;cytosol;;kinase activity;;phosphoenolpyruvate carboxykinase (ATP) activity;;ATP binding;;gluconeogenesis	K01610	pckA	map00020;;map00010;;map00620;;map00710	Citrate cycle (TCA cycle;;Glycolysis / Gluconeogenesis;;Pyruvate metabolism;;Carbon fixation in photosynthetic organisms	COG1866	C:Energy production and conversion				sp|Q9SLZ0|PCKA_MAIZE	Phosphoenolpyruvate carboxykinase (ATP) OS=Zea mays OX=4577 PE=2 SV=1
Os05g0457800	GPAT	3.01609	2.52817		0.487919		XP_015637896.1	glycerol-3-phosphate acyltransferase 5 [Oryza sativa Japonica Group]	GO:0090447;;GO:0010143;;GO:0016020;;GO:0016746;;GO:0016791	molecular_function;;biological_process;;cellular_component;;molecular_function;;molecular_function	glycerol-3-phosphate 2-O-acyltransferase activity;;cutin biosynthetic process;;membrane;;transferase activity, transferring acyl groups;;phosphatase activity	K13508	GPAT	map00564;;map00561	Glycerophospholipid metabolism;;Glycerolipid metabolism	ENOG410YAYJ	I:Lipid transport and metabolism	PF12710.11;;PF01553.25	HAD;;Acyltransferase	haloacid dehalogenase-like hydrolase;;Acyltransferase	sp|Q9CAY3|GPAT5_ARATH	Glycerol-3-phosphate acyltransferase 5 OS=Arabidopsis thaliana OX=3702 GN=GPAT5 PE=1 SV=1	4338997
Os08g0198700	GLO6	1.05049	1.04775		0.00274393		KAB8107702.1	hypothetical protein EE612_042643, partial [Oryza sativa]	GO:0016020;;GO:0005777;;GO:0003973;;GO:0010181;;GO:0051707;;GO:0016491	cellular_component;;cellular_component;;molecular_function;;molecular_function;;biological_process;;molecular_function	membrane;;peroxisome;;(S)-2-hydroxy-acid oxidase activity;;FMN binding;;response to other organism;;oxidoreductase activity	K11517	HAO	map00630;;map04146	Glyoxylate and dicarboxylate metabolism;;Peroxisome	COG1304	C:Energy production and conversion	PF01070.22	FMN_dh	FMN-dependent dehydrogenase	sp|B8AKX6|GLO1_ORYSI	Glycolate oxidase 1 OS=Oryza sativa subsp. indica OX=39946 GN=GLO1 PE=3 SV=1
Os02g0571100	OsCPS2	8.37021	6.65473		1.71549		XP_015625954.1	ent-copalyl diphosphate synthase 2 [Oryza sativa Japonica Group]	GO:0009536;;GO:0016853;;GO:0046872;;GO:0010333;;GO:0000287;;GO:0009686;;GO:0009685;;GO:0006952;;GO:0009905;;GO:0016102;;GO:0016114;;GO:0016829;;GO:0009507	cellular_component;;molecular_function;;molecular_function;;molecular_function;;molecular_function;;biological_process;;biological_process;;biological_process;;molecular_function;;biological_process;;biological_process;;molecular_function;;cellular_component	plastid;;isomerase activity;;metal ion binding;;terpene synthase activity;;magnesium ion binding;;gibberellin biosynthetic process;;gibberellin metabolic process;;defense response;;ent-copalyl diphosphate synthase activity;;diterpenoid biosynthetic process;;terpenoid biosynthetic process;;lyase activity;;chloroplast	K04120	E5.5.1.13	map00904	Diterpenoid biosynthesis	ENOG410XNXR	I:Lipid transport and metabolism	PF01397.25	Terpene_synth	Terpene synthase, N-terminal domain	sp|Q6Z5I0|CPS2_ORYSJ	Ent-copalyl diphosphate synthase 2, chloroplastic OS=Oryza sativa subsp. japonica OX=39947 GN=CPS2 PE=1 SV=1	9266189
Os12g0491800	OsKSL10	8.74795	6.77182		1.97613		NP_001391661.1	ent-sandaracopimara-8(14),15-diene synthase, chloroplastic [Oryza sativa Japonica Group]	GO:0009536;;GO:0010333;;GO:0000287;;GO:0006952;;GO:0034280;;GO:0016102;;GO:0046872;;GO:0016829;;GO:0009507	cellular_component;;molecular_function;;molecular_function;;biological_process;;molecular_function;;biological_process;;molecular_function;;molecular_function;;cellular_component	plastid;;terpene synthase activity;;magnesium ion binding;;defense response;;ent-sandaracopimaradiene synthase activity;;diterpenoid biosynthetic process;;metal ion binding;;lyase activity;;chloroplast	K14037	KSL10	map00904	Diterpenoid biosynthesis			PF03936.20;;PF01397.25;;PF19086.4	Terpene_synth_C;;Terpene_synth;;Terpene_syn_C_2	Terpene synthase family, metal binding domain;;Terpene synthase, N-terminal domain;;Terpene synthase family 2, C-terminal metal binding	sp|Q2QQJ5|KSL10_ORYSJ	Ent-sandaracopimara-8(14),15-diene synthase, chloroplastic OS=Oryza sativa subsp. japonica OX=39947 GN=KSL10 PE=1 SV=2	4352248
Os02g0570500	Oscyp71Z6	3.56048	2.54386		1.01662		NP_001403616.1	ent-isokaurene C2/C3-hydroxylase [Oryza sativa Japonica Group]	GO:0004497;;GO:0016020;;GO:0020037;;GO:0016705;;GO:0036201;;GO:0005506;;GO:0046872;;GO:0016102;;GO:0016491	molecular_function;;cellular_component;;molecular_function;;molecular_function;;molecular_function;;molecular_function;;molecular_function;;biological_process;;molecular_function	monooxygenase activity;;membrane;;heme binding;;oxidoreductase activity, acting on paired donors, with incorporation or reduction of molecular oxygen;;ent-isokaurene C2-hydroxylase activity;;iron ion binding;;metal ion binding;;diterpenoid biosynthetic process;;oxidoreductase activity	K21291;K16083	CYP71Z7;CYP71Z6	map00904	Diterpenoid biosynthesis	COG2124	Q:Secondary metabolites biosynthesis, transport and catabolism	PF00067.26	p450	Cytochrome P450	sp|A3A871|C71Z6_ORYSJ	Ent-isokaurene C2/C3-hydroxylase OS=Oryza sativa subsp. japonica OX=39947 GN=CYP71Z6 PE=1 SV=1
Os04g0179100	OsSDR110C-MS2	9.0014	7.02414		1.97725		BAS87951.1	Os04g0179100, partial [Oryza sativa Japonica Group]	GO:0019290;;GO:0102960;;GO:0008667;;GO:0016616	biological_process;;molecular_function;;molecular_function;;molecular_function	siderophore biosynthetic process;;momilactone-A synthase activity;;2,3-dihydro-2,3-dihydroxybenzoate dehydrogenase activity;;oxidoreductase activity, acting on the CH-OH group of donors, NAD or NADP as acceptor	K13070	MAS	map00904	Diterpenoid biosynthesis	COG1028	S:Function unknown	PF13561.10	adh_short_C2	Enoyl-(Acyl carrier protein) reductase	sp|Q7FAE1|MOMAS_ORYSJ	Momilactone A synthase OS=Oryza sativa subsp. japonica OX=39947 GN=Os04g0179200 PE=2 SV=1

## Sheet: Table S7
Table S7 List of common differentially expressed genes synergistically downregulated by melatonin and nano-zero valent iron (Cd vs Cd-nZVI and Cd vs Cd-MT-nZVI) in O.sativa leaves under Cd containated and Se enriched paddy soil involved in KEGG pathways .
Gene ID	Gene Name	Cd_MT_nZVI_vs_Cd_fc(Cd_MT_nZVI/Cd)	Cd_nZVI_vs_Cd_fc(Cd_nZVI/Cd)		C-D		NR Hit-name	NR Description	GO ID	GO Term	GO Description	KO ID	KO Name	Pathway ID	Pathway Definition	EggNOG	EggNOG Description	Pfam ID	Domain	Domain Description	Swiss-Prot Hit-name	Swiss-Prot Description	Entrez
Os04g0657300		0.485687	0.31146		0.174226		XP_015634051.1	farnesyl pyrophosphate synthase 2 [Oryza sativa Japonica Group]	GO:0016765;;GO:0008299;;GO:0016740	molecular_function;;biological_process;;molecular_function	transferase activity, transferring alkyl or aryl (other than methyl) groups;;isoprenoid biosynthetic process;;transferase activity	K00787	FDPS	map00900	Terpenoid backbone biosynthesis	COG0142	H:Coenzyme transport and metabolism	PF00348.21	polyprenyl_synt	Polyprenyl synthetase	sp|P49353|FPPS_MAIZE	Farnesyl pyrophosphate synthase OS=Zea mays OX=4577 GN=FPS PE=2 SV=1	4337261
Os09g0346500	CAB1R	0.478983	0.217688		0.261295		NP_001390670.1	chlorophyll a-b binding protein 1, chloroplastic [Oryza sativa Japonica Group]	GO:0009535;;GO:0009579;;GO:0016168;;GO:0009536;;GO:0009522;;GO:0009523;;GO:0016020;;GO:0015979;;GO:0009768;;GO:0009416;;GO:0046872;;GO:0009765;;GO:0009507	cellular_component;;cellular_component;;molecular_function;;cellular_component;;cellular_component;;cellular_component;;cellular_component;;biological_process;;biological_process;;biological_process;;molecular_function;;biological_process;;cellular_component	chloroplast thylakoid membrane;;thylakoid;;chlorophyll binding;;plastid;;photosystem I;;photosystem II;;membrane;;photosynthesis;;photosynthesis, light harvesting in photosystem I;;response to light stimulus;;metal ion binding;;photosynthesis, light harvesting;;chloroplast	K08912	LHCB1	map00196	Photosynthesis - antenna proteins	ENOG410ZHBU	J:Translation, ribosomal structure and biogenesis	PF00504.25	Chloroa_b-bind	Chlorophyll A-B binding protein	sp|P12330|CB21_ORYSJ	Chlorophyll a-b binding protein 1, chloroplastic OS=Oryza sativa subsp. japonica OX=39947 GN=CAB1R PE=2 SV=2	4346803
Os04g0624600	SSIIIB	0.307558	0.293291		0.014267		XP_015636215.1	starch synthase 3, chloroplastic/amyloplastic [Oryza sativa Japonica Group]	GO:0004373;;GO:2001070;;GO:0016740;;GO:0016757;;GO:0009501;;GO:0009507;;GO:0019252	molecular_function;;molecular_function;;molecular_function;;molecular_function;;cellular_component;;cellular_component;;biological_process	glycogen (starch) synthase activity;;starch binding;;transferase activity;;transferase activity, transferring glycosyl groups;;amyloplast;;chloroplast;;starch biosynthetic process	K00703	glgA	map00500	Starch and sucrose metabolism	COG0297	G:Carbohydrate transport and metabolism	PF08323.15;;PF16760.9;;PF13439.10;;PF00534.24;;PF13579.10	Glyco_transf_5;;CBM53;;Glyco_transf_4;;Glycos_transf_1;;Glyco_trans_4_4	Starch synthase catalytic domain;;Starch/carbohydrate-binding module (family 53;;Glycosyltransferase Family 4;;Glycosyl transferases group 1;;Glycosyl transferase 4-like domain	sp|A0A0P0XCU3|SSY3A_ORYSJ	Soluble starch synthase 3a, chloroplastic/amyloplastic OS=Oryza sativa subsp. japonica OX=39947 GN=SSIIIA PE=1 SV=2	4337056
Os07g0546000	IPI	0.459686	0.430918		0.0287676		XP_015646798.1	isopentenyl-diphosphate Delta-isomerase I [Oryza sativa Japonica Group]	GO:0005737;;GO:0015995;;GO:0016853;;GO:0009240;;GO:0008299;;GO:0004452;;GO:0003743;;GO:0050992	cellular_component;;biological_process;;molecular_function;;biological_process;;biological_process;;molecular_function;;molecular_function;;biological_process	cytoplasm;;chlorophyll biosynthetic process;;isomerase activity;;isopentenyl diphosphate biosynthetic process;;isoprenoid biosynthetic process;;isopentenyl-diphosphate delta-isomerase activity;;translation initiation factor activity;;dimethylallyl diphosphate biosynthetic process	K01823	idi, IDI	map00900	Terpenoid backbone biosynthesis	COG1443	I:Lipid transport and metabolism	PF00293.32	NUDIX	NUDIX domain	sp|O48964|IDI1_CAMAC	Isopentenyl-diphosphate Delta-isomerase I OS=Camptotheca acuminata OX=16922 GN=IPI1 PE=2 SV=1	4343523
Os02g0102900	OsCPn60beta2	0.446101	0.244127		0.201974		XP_015626534.1	ruBisCO large subunit-binding protein subunit beta, chloroplastic [Oryza sativa Japonica Group]	GO:0006457;;GO:0008289;;GO:0000166;;GO:0140662;;GO:0042026;;GO:0005524	biological_process;;molecular_function;;molecular_function;;deleted;;biological_process;;molecular_function	protein folding;;lipid binding;;nucleotide binding;;old GO;;protein refolding;;ATP binding	K04077	groEL, HSPD1	map03018	RNA degradation	COG0459	O:Posttranslational modification, protein turnover, chaperones	PF00118.28	Cpn60_TCP1	TCP-1/cpn60 chaperonin family	sp|P08927|RUBB_PEA	RuBisCO large subunit-binding protein subunit beta, chloroplastic OS=Pisum sativum OX=3888 PE=1 SV=2	4327993
Os04g0576800		0.455098	0.370374		0.0847233		NP_001389341.1	polyprenol reductase 1 [Oryza sativa Japonica Group]	GO:0016491;;GO:0044238;;GO:0006629;;GO:0006486;;GO:0006488;;GO:0019408;;GO:0016627;;GO:0016020;;GO:0102389;;GO:0005789;;GO:0071704;;GO:0016095;;GO:0003865;;GO:0005783	molecular_function;;biological_process;;biological_process;;biological_process;;biological_process;;biological_process;;molecular_function;;cellular_component;;molecular_function;;cellular_component;;biological_process;;biological_process;;molecular_function;;cellular_component	oxidoreductase activity;;primary metabolic process;;lipid metabolic process;;protein glycosylation;;dolichol-linked oligosaccharide biosynthetic process;;dolichol biosynthetic process;;oxidoreductase activity, acting on the CH-CH group of donors;;membrane;;polyprenol reductase activity;;endoplasmic reticulum membrane;;organic substance metabolic process;;polyprenol catabolic process;;3-oxo-5-alph…	K12345	SRD5A3	map00510	N-Glycan biosynthesis	ENOG4111JQM	S:Function unknown	PF02544.20	Steroid_dh	3-oxo-5-alpha-steroid 4-dehydrogenase	sp|A2XWN6|POED1_ORYSI	Polyprenol reductase 1 OS=Oryza sativa subsp. indica OX=39946 GN=OsI_17065 PE=3 SV=1	4336740
Os12g0514500		0.464142	0.43108		0.0330623		XP_015620006.1	heat shock protein 90-6, mitochondrial [Oryza sativa Japonica Group]	GO:0006457;;GO:0005783;;GO:0009570;;GO:0005829;;GO:0005739;;GO:0000166;;GO:0050821;;GO:0140662;;GO:0051082;;GO:0016887;;GO:0005886;;GO:0032991;;GO:0048471;;GO:0034605;;GO:0005524	biological_process;;cellular_component;;cellular_component;;cellular_component;;cellular_component;;molecular_function;;biological_process;;deleted;;molecular_function;;molecular_function;;cellular_component;;cellular_component;;cellular_component;;biological_process;;molecular_function	protein folding;;endoplasmic reticulum;;chloroplast stroma;;cytosol;;mitochondrion;;nucleotide binding;;protein stabilization;;old GO;;unfolded protein binding;;ATPase activity;;plasma membrane;;macromolecular complex;;perinuclear region of cytoplasm;;cellular response to heat;;ATP binding	K09487	HSP90B, TRA1	map04626;;map04141	Plant-pathogen interaction;;Protein processing in endoplasmic reticulum	COG0326	O:Posttranslational modification, protein turnover, chaperones	PF00183.22;;PF13589.10;;PF02518.30	HSP90;;HATPase_c_3;;HATPase_c	Hsp90 protein;;Histidine kinase-, DNA gyrase B-, and HSP90-like ATPase;;Histidine kinase-, DNA gyrase B-, and HSP90-like ATPase	sp|F4JFN3|HS906_ARATH	Heat shock protein 90-6, mitochondrial OS=Arabidopsis thaliana OX=3702 GN=HSP90-6 PE=1 SV=1	4352339
Os03g0731900	OsHDR	0.442476	0.289294		0.153182		NP_001389176.1	4-hydroxy-3-methylbut-2-enyl diphosphate reductase, chloroplastic [Oryza sativa Japonica Group]	GO:0009536;;GO:0051539;;GO:0009570;;GO:0051536;;GO:0050992;;GO:0019288;;GO:0046872;;GO:0008299;;GO:0009507;;GO:0051745;;GO:0016491	cellular_component;;molecular_function;;cellular_component;;molecular_function;;biological_process;;biological_process;;molecular_function;;biological_process;;cellular_component;;molecular_function;;molecular_function	plastid;;4 iron, 4 sulfur cluster binding;;chloroplast stroma;;iron-sulfur cluster binding;;dimethylallyl diphosphate biosynthetic process;;isopentenyl diphosphate biosynthetic process, methylerythritol 4-phosphate pathway;;metal ion binding;;isoprenoid biosynthetic process;;chloroplast;;4-hydroxy-3-methylbut-2-en-1-yl diphosphate reductase activity;;oxidoreductase activity	K03527	ispH, lytB	map00900	Terpenoid backbone biosynthesis	COG0761	I:Lipid transport and metabolism	PF02401.22	LYTB	LytB protein	sp|Q6AVG6|ISPH_ORYSJ	4-hydroxy-3-methylbut-2-enyl diphosphate reductase, chloroplastic OS=Oryza sativa subsp. japonica OX=39947 GN=ISPH PE=2 SV=1	4334003
Os10g0465700	OsSTA246	0.297847	0.212947		0.0849		XP_025876615.1	beta-amylase 1, chloroplastic-like [Oryza sativa Japonica Group]	GO:0016161;;GO:0009507;;GO:0102229;;GO:0000272	molecular_function;;cellular_component;;molecular_function;;biological_process	beta-amylase activity;;chloroplast;;amylopectin maltohydrolase activity;;polysaccharide catabolic process	K01177	E3.2.1.2	map00500	Starch and sucrose metabolism	ENOG410XRH5	S:Function unknown	PF01373.21	Glyco_hydro_14	Glycosyl hydrolase family 14	sp|Q9AV88|BAMY1_ORYSJ	Beta-amylase 1, chloroplastic OS=Oryza sativa subsp. japonica OX=39947 GN=BAMY1 PE=1 SV=1
Os05g0574400		0.478474	0.337482		0.140991		XP_015639465.1	malate dehydrogenase, mitochondrial [Oryza sativa Japonica Group]	GO:0005737;;GO:0016615;;GO:0016616;;GO:0005739;;GO:0009505;;GO:0003824;;GO:0006099;;GO:0030060;;GO:0019752;;GO:0006108;;GO:0016491	cellular_component;;molecular_function;;molecular_function;;cellular_component;;cellular_component;;molecular_function;;biological_process;;molecular_function;;biological_process;;biological_process;;molecular_function	cytoplasm;;malate dehydrogenase activity;;oxidoreductase activity, acting on the CH-OH group of donors, NAD or NADP as acceptor;;mitochondrion;;plant-type cell wall;;catalytic activity;;tricarboxylic acid cycle;;L-malate dehydrogenase activity;;carboxylic acid metabolic process;;malate metabolic process;;oxidoreductase activity	K00026	MDH2	map00020;;map00630;;map00620;;map00710;;map00270	Citrate cycle (TCA cycle;;Glyoxylate and dicarboxylate metabolism;;Pyruvate metabolism;;Carbon fixation in photosynthetic organisms;;Cysteine and methionine metabolism	COG0039	C:Energy production and conversion	PF00056.27;;PF02866.22;;PF01073.23	Ldh_1_N;;Ldh_1_C;;3Beta_HSD	lactate/malate dehydrogenase, NAD binding domain;;lactate/malate dehydrogenase, alpha/beta C-terminal domain;;3-beta hydroxysteroid dehydrogenase/isomerase family	sp|P17783|MDHM_CITLA	Malate dehydrogenase, mitochondrial OS=Citrullus lanatus OX=3654 GN=MMDH PE=1 SV=1	4339682
Os07g0633200		0.31677	0.260718		0.0560517		EEC82509.1	hypothetical protein OsI_26989 [Oryza sativa Indica Group]	GO:0005737;;GO:0016607;;GO:0003676;;GO:0000398;;GO:0003723	cellular_component;;cellular_component;;molecular_function;;biological_process;;molecular_function	cytoplasm;;nuclear speck;;nucleic acid binding;;mRNA splicing, via spliceosome;;RNA binding	K12900	SRSF10, FUSIP1	map03040	Spliceosome	COG0724;;ENOG41122ZB	S:Function unknown;;S:Function unknown	PF00076.26	RRM_1	RNA recognition motif	sp|Q9SEU4|SRC33_ARATH	Serine/arginine-rich SC35-like splicing factor SCL33 OS=Arabidopsis thaliana OX=3702 GN=SCL33 PE=1 SV=1	4344009

## Sheet: Table S8
Table S8 List of common differentially expressed genes and gene ontologies GOs synergistically upregulated by melatonin and nano-zero valent iron (Cd vs Cd-nZVI and Cd vs Cd-MT-nZVI) in O.sativa leaves under Cd containated and Se enriched paddy soil involved in KEGG pathways .
Common GO	Category	GO Term	KEGG pathway	Gene/KO Name	KEGG pathway	Gene/KO Name	KEGG pathway	Gene/KO Name	KEGG pathway	Gene/KO Name	KEGG pathway	Gene/KO Name	KEGG pathway	Gene/KO Name	KEGG pathway	Gene/KO Name
GO:0052865	1-deoxy-D-xylulose 5-phosphate biosynthetic process	biological_process	Thiamine metabolism	OsDXS	Terpenoid backbone biosynthesis	OsDXS
GO:0009536	plastid	cellular_component	Thiamine metabolism	OsDXS	Terpenoid backbone biosynthesis	OsDXS	Diterpenoid biosynthesis	OsCPS4	Diterpenoid biosynthesis	OsCPS2	Diterpenoid biosynthesis	OsKSL10
GO:0009228	thiamine biosynthetic process	biological_process	Thiamine metabolism	OsDXS	Terpenoid backbone biosynthesis	OsDXS
GO:0046872	metal ion binding	molecular_function	Thiamine metabolism	OsDXS	Terpenoid backbone biosynthesis	OsDXS	Diterpenoid biosynthesis	OsCPS4	Glutathione metabolism	CARP, pepA	Diterpenoid biosynthesis	OsCPS2	Diterpenoid biosynthesis	OsKSL10	Diterpenoid biosynthesis	Oscyp71Z6
GO:0008661	1-deoxy-D-xylulose-5-phosphate synthase activity	molecular_function	Thiamine metabolism	OsDXS	Terpenoid backbone biosynthesis	OsDXS
GO:0016740	transferase activity	molecular_function	Thiamine metabolism	OsDXS	Terpenoid backbone biosynthesis	OsDXS
GO:0003824	catalytic activity	molecular_function	Thiamine metabolism	OsDXS	Terpenoid backbone biosynthesis	OsDXS	Phenylpropanoid biosynthesis	OsPAL02	Phenylalanine metabolism	OsPAL02
GO:0008299	isoprenoid biosynthetic process	biological_process	Thiamine metabolism	OsDXS	Terpenoid backbone biosynthesis	OsDXS
GO:0016744	transferase activity, transferring aldehyde or ketonic groups	molecular_function	Thiamine metabolism	OsDXS	Terpenoid backbone biosynthesis	OsDXS
GO:0016114	terpenoid biosynthetic process	biological_process	Thiamine metabolism	OsDXS	Terpenoid backbone biosynthesis	OsDXS	Diterpenoid biosynthesis	OsCPS2
GO:0009507	chloroplast	cellular_component	Thiamine metabolism	OsDXS	Terpenoid backbone biosynthesis	OsDXS	Diterpenoid biosynthesis	OsCPS4	Glutathione metabolism	CARP, pepA	Diterpenoid biosynthesis	OsCPS2	Diterpenoid biosynthesis	OsKSL10
GO:0016853	isomerase activity	molecular_function	Diterpenoid biosynthesis	OsCPS4	Diterpenoid biosynthesis	OsCPS2
GO:0051498	syn-copalyl diphosphate synthase activity	molecular_function	Diterpenoid biosynthesis	OsCPS4
GO:0010333	terpene synthase activity	molecular_function	Diterpenoid biosynthesis	OsCPS4	Diterpenoid biosynthesis	OsCPS2	Diterpenoid biosynthesis	OsKSL10
GO:0000287	magnesium ion binding	molecular_function	Diterpenoid biosynthesis	OsCPS4	Glutathione metabolism	CARP, pepA	Diterpenoid biosynthesis	OsCPS2	Diterpenoid biosynthesis	OsKSL10
GO:0009686	gibberellin biosynthetic process	biological_process	Diterpenoid biosynthesis	OsCPS4	Diterpenoid biosynthesis	OsCPS2
GO:0006952	defense response	biological_process	Diterpenoid biosynthesis	OsCPS4	Diterpenoid biosynthesis	OsCPS2	Diterpenoid biosynthesis	OsKSL10
GO:0016102	diterpenoid biosynthetic process	biological_process	Diterpenoid biosynthesis	OsCPS4	Diterpenoid biosynthesis	OsCPS2	Diterpenoid biosynthesis	OsKSL10	Diterpenoid biosynthesis	Oscyp71Z6
GO:0016829	lyase activity	molecular_function	Diterpenoid biosynthesis	OsCPS4	Phenylpropanoid biosynthesis	OsPAL02	Phenylalanine metabolism	OsPAL02	Diterpenoid biosynthesis	OsCPS2	Diterpenoid biosynthesis	OsKSL10
GO:0005737	cytoplasm	cellular_component	Phenylpropanoid biosynthesis	OsPAL02	Phenylalanine metabolism	OsPAL02	Glutathione metabolism	CARP, pepA
GO:0016841	ammonia-lyase activity	molecular_function	Phenylpropanoid biosynthesis	OsPAL02	Phenylalanine metabolism	OsPAL02
GO:0006559	L-phenylalanine catabolic process	biological_process	Phenylpropanoid biosynthesis	OsPAL02	Phenylalanine metabolism	OsPAL02
GO:0009800	cinnamic acid biosynthetic process	biological_process	Phenylpropanoid biosynthesis	OsPAL02	Phenylalanine metabolism	OsPAL02
GO:0045548	phenylalanine ammonia-lyase activity	molecular_function	Phenylpropanoid biosynthesis	OsPAL02	Phenylalanine metabolism	OsPAL02
GO:0009698	phenylpropanoid metabolic process	biological_process	Phenylpropanoid biosynthesis	OsPAL02	Phenylalanine metabolism	OsPAL02
GO:0009733	response to auxin	biological_process	Plant hormone signal transduction	OsSAUR11
GO:0019538	protein metabolic process	biological_process	Glutathione metabolism	CARP, pepA
GO:0070006	metalloaminopeptidase activity	molecular_function	Glutathione metabolism	CARP, pepA
GO:0006508	proteolysis	molecular_function	Glutathione metabolism	CARP, pepA
GO:0008233	peptidase activity	molecular_function	Glutathione metabolism	CARP, pepA
GO:0016310	phosphorylation	biological_process	Citrate cycle (TCA cycle	pckA	Glycolysis / Gluconeogenesis	pckA	Pyruvate metabolism	pckA	Carbon fixation in photosynthetic organisms	pckA
GO:0005829	cytosol	cellular_component	Citrate cycle (TCA cycle	pckA	Glycolysis / Gluconeogenesis	pckA	Pyruvate metabolism	pckA	Carbon fixation in photosynthetic organisms	pckA
GO:0016301	kinase activity	molecular_function	Citrate cycle (TCA cycle	pckA	Glycolysis / Gluconeogenesis	pckA	Pyruvate metabolism	pckA	Carbon fixation in photosynthetic organisms	pckA
GO:0004612	phosphoenolpyruvate carboxykinase (ATP) activity	molecular_function	Citrate cycle (TCA cycle	pckA	Glycolysis / Gluconeogenesis	pckA	Pyruvate metabolism	pckA	Carbon fixation in photosynthetic organisms	pckA
GO:0005524	ATP binding	molecular_function	Citrate cycle (TCA cycle	pckA	Glycolysis / Gluconeogenesis	pckA	Pyruvate metabolism	pckA	Carbon fixation in photosynthetic organisms	pckA
GO:0006094	gluconeogenesis	biological_process	Citrate cycle (TCA cycle	pckA	Glycolysis / Gluconeogenesis	pckA	Pyruvate metabolism	pckA	Carbon fixation in photosynthetic organisms	pckA
GO:0090447	glycerol-3-phosphate 2-O-acyltransferase activity	molecular_function	Glycerophospholipid metabolism	GPAT	Glycerolipid metabolism	GPAT
GO:0010143	cutin biosynthetic process	biological_process	Glycerophospholipid metabolism	GPAT	Glycerolipid metabolism	GPAT
GO:0016020	membrane	cellular_component	Glycerophospholipid metabolism	GPAT	Glycerolipid metabolism	GPAT	Glyoxylate and dicarboxylate metabolism	GLO6	Peroxisome	GLO6	Diterpenoid biosynthesis	Oscyp71Z6
GO:0016746	transferase activity, transferring acyl groups	molecular_function	Glycerophospholipid metabolism	GPAT	Glycerolipid metabolism	GPAT
GO:0016791	phosphatase activity	molecular_function	Glycerophospholipid metabolism	GPAT	Glycerolipid metabolism	GPAT
GO:0005777	peroxisome	cellular_component	Glyoxylate and dicarboxylate metabolism	GLO6	Peroxisome	GLO6
GO:0003973	(S)-2-hydroxy-acid oxidase activity	molecular_function	Glyoxylate and dicarboxylate metabolism	GLO6	Peroxisome	GLO6
GO:0010181	FMN binding	molecular_function	Glyoxylate and dicarboxylate metabolism	GLO6	Peroxisome	GLO6
GO:0051707	response to other organism	biological_process	Glyoxylate and dicarboxylate metabolism	GLO6	Peroxisome	GLO6
GO:0016491	oxidoreductase activity	molecular_function	Glyoxylate and dicarboxylate metabolism	GLO6	Peroxisome	GLO6	Diterpenoid biosynthesis	Oscyp71Z6
GO:0009685	gibberellin metabolic process	biological_process	Diterpenoid biosynthesis	OsCPS2
GO:0009905	ent-copalyl diphosphate synthase activity	molecular_function	Diterpenoid biosynthesis	OsCPS2
GO:0034280	ent-sandaracopimaradiene synthase activity	molecular_function	Diterpenoid biosynthesis	OsKSL10
GO:0004497	monooxygenase activity	molecular_function	Diterpenoid biosynthesis	Oscyp71Z6
GO:0020037	heme binding	molecular_function	Diterpenoid biosynthesis	Oscyp71Z6
GO:0016705	oxidoreductase activity, acting on paired donors, with incorporation or reduction of molecular oxygen	molecular_function	Diterpenoid biosynthesis	Oscyp71Z6
GO:0036201	ent-isokaurene C2-hydroxylase activity	molecular_function	Diterpenoid biosynthesis	Oscyp71Z6
GO:0005506	iron ion binding	molecular_function	Diterpenoid biosynthesis	Oscyp71Z6
GO:0019290	siderophore biosynthetic process	biological_process	Diterpenoid biosynthesis	OsSDR110C-MS2
GO:0102960	momilactone-A synthase activity	molecular_function	Diterpenoid biosynthesis	OsSDR110C-MS2
GO:0008667	2,3-dihydro-2,3-dihydroxybenzoate dehydrogenase activity	molecular_function	Diterpenoid biosynthesis	OsSDR110C-MS2
GO:0016616	oxidoreductase activity, acting on the CH-OH group of donors, NAD or NADP as acceptor	molecular_function	Diterpenoid biosynthesis	OsSDR110C-MS2

## Sheet: Table S9
Table S9 List of common differentially expressed genes and gene ontologies GOs synergistically downregulated by melatonin and nano-zero valent iron (Cd vs Cd-nZVI and Cd vs Cd-MT-nZVI) in O.sativa leaves under Cd containated and Se enriched paddy soil involved in pathways .
Common GO	Category	GO Term	KEGG pathway	Gene/KO Name	KEGG pathway	Gene/KO Name	KEGG pathway	Gene/KO Name	KEGG pathway	Gene/KO Name	KEGG pathway	Gene/KO Name	KEGG pathway	Gene/KO Name	KEGG pathway	Gene/KO Name
GO:0016765	transferase activity, transferring alkyl or aryl (other than methyl) groups	molecular_function	Terpenoid backbone biosynthesis	FDPS
GO:0008299	isoprenoid biosynthetic process	biological_process	Terpenoid backbone biosynthesis	FDPS	Terpenoid backbone biosynthesis	IPI	Terpenoid backbone biosynthesis	OsHDR
GO:0016740	transferase activity	molecular_function	Terpenoid backbone biosynthesis	FDPS	Starch and sucrose metabolism	SSIIIB
GO:0009535	chloroplast thylakoid membrane	cellular_component	Photosynthesis - antenna proteins	CAB1R
GO:0009579	thylakoid	cellular_component	Photosynthesis - antenna proteins	CAB1R
GO:0016168	chlorophyll binding	molecular_function	Photosynthesis - antenna proteins	CAB1R
GO:0009536	plastid	cellular_component	Photosynthesis - antenna proteins	CAB1R	Terpenoid backbone biosynthesis	OsHDR
GO:0009522	photosystem I	cellular_component	Photosynthesis - antenna proteins	CAB1R
GO:0009523	photosystem II	cellular_component	Photosynthesis - antenna proteins	CAB1R
GO:0016020	membrane	cellular_component	Photosynthesis - antenna proteins	CAB1R	N-Glycan biosynthesis	SRD5A3
GO:0015979	photosynthesis	biological_process	Photosynthesis - antenna proteins	CAB1R
GO:0009768	photosynthesis, light harvesting in photosystem I	biological_process	Photosynthesis - antenna proteins	CAB1R
GO:0009416	response to light stimulus	biological_process	Photosynthesis - antenna proteins	CAB1R
GO:0046872	metal ion binding	molecular_function	Photosynthesis - antenna proteins	CAB1R	Terpenoid backbone biosynthesis	OsHDR
GO:0009765	photosynthesis, light harvesting	biological_process	Photosynthesis - antenna proteins	CAB1R
GO:0009507	chloroplast	cellular_component	Photosynthesis - antenna proteins	CAB1R	Starch and sucrose metabolism	SSIIIB	Terpenoid backbone biosynthesis	OsHDR	Starch and sucrose metabolism	OsSTA246
GO:0004373	glycogen (starch) synthase activity	molecular_function	Starch and sucrose metabolism	SSIIIB
GO:2001070	starch binding	molecular_function	Starch and sucrose metabolism	SSIIIB
GO:0016757	transferase activity, transferring glycosyl groups	molecular_function	Starch and sucrose metabolism	SSIIIB
GO:0009501	amyloplast	cellular_component	Starch and sucrose metabolism	SSIIIB
GO:0019252	starch biosynthetic process	biological_process	Starch and sucrose metabolism	SSIIIB
GO:0005737	cytoplasm	cellular_component	Terpenoid backbone biosynthesis	IPI	Citrate cycle (TCA cycle)	MDH2	Glyoxylate and dicarboxylate metabolism	MDH2	Pyruvate metabolism	MDH2	Carbon fixation in photosynthetic organisms	MDH2	Cysteine and methionine metabolism	MDH2	Spliceosome	SRSF10, FUSIP1
GO:0015995	chlorophyll biosynthetic process	biological_process	Terpenoid backbone biosynthesis	IPI
GO:0016853	isomerase activity	molecular_function	Terpenoid backbone biosynthesis	IPI
GO:0009240	isopentenyl diphosphate biosynthetic process	biological_process	Terpenoid backbone biosynthesis	IPI
GO:0004452	isopentenyl-diphosphate delta-isomerase activity	molecular_function	Terpenoid backbone biosynthesis	IPI
GO:0003743	translation initiation factor activity	molecular_function	Terpenoid backbone biosynthesis	IPI
GO:0050992	dimethylallyl diphosphate biosynthetic process	biological_process	Terpenoid backbone biosynthesis	IPI	Terpenoid backbone biosynthesis	OsHDR
GO:0006457	protein folding	biological_process	RNA degradation	OsCPn60beta2	Plant-pathogen interaction;;Protein processing in endoplasmic reticulum	HSP90B, TRA1
GO:0008289	lipid binding	molecular_function	RNA degradation	OsCPn60beta2
GO:0000166	nucleotide binding	molecular_function	RNA degradation	OsCPn60beta2
GO:0140662	old GO	deleted	RNA degradation	OsCPn60beta2	Plant-pathogen interaction;;Protein processing in endoplasmic reticulum	HSP90B, TRA1
GO:0042026	protein refolding	biological_process	RNA degradation	OsCPn60beta2
GO:0005524	ATP binding	molecular_function	RNA degradation	OsCPn60beta2	Plant-pathogen interaction;;Protein processing in endoplasmic reticulum	HSP90B, TRA1
GO:0016491	oxidoreductase activity	molecular_function	N-Glycan biosynthesis	SRD5A3	Terpenoid backbone biosynthesis	OsHDR	Citrate cycle (TCA cycle)	MDH2	Glyoxylate and dicarboxylate metabolism	MDH2	Pyruvate metabolism	MDH2	Carbon fixation in photosynthetic organisms	MDH2	Cysteine and methionine metabolism	MDH2
GO:0044238	primary metabolic process	biological_process	N-Glycan biosynthesis	SRD5A3
GO:0006629	lipid metabolic process	biological_process	N-Glycan biosynthesis	SRD5A3
GO:0006486	protein glycosylation	biological_process	N-Glycan biosynthesis	SRD5A3
GO:0006488	dolichol-linked oligosaccharide biosynthetic process	biological_process	N-Glycan biosynthesis	SRD5A3
GO:0019408	dolichol biosynthetic process	biological_process	N-Glycan biosynthesis	SRD5A3
GO:0016627	oxidoreductase activity, acting on the CH-CH group of donors	molecular_function	N-Glycan biosynthesis	SRD5A3
GO:0102389	polyprenol reductase activity	molecular_function	N-Glycan biosynthesis	SRD5A3
GO:0005789	endoplasmic reticulum membrane	cellular_component	N-Glycan biosynthesis	SRD5A3
GO:0071704	organic substance metabolic process	biological_process	N-Glycan biosynthesis	SRD5A3
GO:0016095	polyprenol catabolic process	biological_process	N-Glycan biosynthesis	SRD5A3
GO:0003865	3-oxo-5-alpha-steroid 4-dehydrogenase activity	molecular_function	N-Glycan biosynthesis	SRD5A3
GO:0005783	endoplasmic reticulum	cellular_component	N-Glycan biosynthesis	SRD5A3	Plant-pathogen interaction;;Protein processing in endoplasmic reticulum	HSP90B, TRA1
GO:0009570	chloroplast stroma	cellular_component	Plant-pathogen interaction;;Protein processing in endoplasmic reticulum	HSP90B, TRA1	Terpenoid backbone biosynthesis	OsHDR
GO:0005829	cytosol	cellular_component	Plant-pathogen interaction;;Protein processing in endoplasmic reticulum	HSP90B, TRA1
GO:0005739	mitochondrion	cellular_component	Plant-pathogen interaction;;Protein processing in endoplasmic reticulum	HSP90B, TRA1	Citrate cycle (TCA cycle)	MDH2	Glyoxylate and dicarboxylate metabolism	MDH2	Pyruvate metabolism	MDH2	Carbon fixation in photosynthetic organisms	MDH2	Cysteine and methionine metabolism	MDH2
GO:0000166	nucleotide binding	molecular_function	Plant-pathogen interaction;;Protein processing in endoplasmic reticulum	HSP90B, TRA1
GO:0050821	protein stabilization	biological_process	Plant-pathogen interaction;;Protein processing in endoplasmic reticulum	HSP90B, TRA1
GO:0051082	unfolded protein binding	molecular_function	Plant-pathogen interaction;;Protein processing in endoplasmic reticulum	HSP90B, TRA1
GO:0016887	ATPase activity	molecular_function	Plant-pathogen interaction;;Protein processing in endoplasmic reticulum	HSP90B, TRA1
GO:0005886	plasma membrane	cellular_component	Plant-pathogen interaction;;Protein processing in endoplasmic reticulum	HSP90B, TRA1
GO:0032991	macromolecular complex	cellular_component	Plant-pathogen interaction;;Protein processing in endoplasmic reticulum	HSP90B, TRA1
GO:0048471	perinuclear region of cytoplasm	cellular_component	Plant-pathogen interaction;;Protein processing in endoplasmic reticulum	HSP90B, TRA1
GO:0034605	cellular response to heat	biological_process	Plant-pathogen interaction;;Protein processing in endoplasmic reticulum	HSP90B, TRA1
GO:0051539	4 iron, 4 sulfur cluster binding	molecular_function	Terpenoid backbone biosynthesis	OsHDR
GO:0051536	iron-sulfur cluster binding	molecular_function	Terpenoid backbone biosynthesis	OsHDR
GO:0019288	isopentenyl diphosphate biosynthetic process, methylerythritol 4-phosphate pathway	biological_process	Terpenoid backbone biosynthesis	OsHDR
GO:0051745	4-hydroxy-3-methylbut-2-en-1-yl diphosphate reductase activity	molecular_function	Terpenoid backbone biosynthesis	OsHDR
GO:0016161	beta-amylase activity	molecular_function	Starch and sucrose metabolism	OsSTA246
GO:0102229	amylopectin maltohydrolase activity	molecular_function	Starch and sucrose metabolism	OsSTA246
GO:0000272	polysaccharide catabolic process	biological_process	Starch and sucrose metabolism	OsSTA246
GO:0016615	malate dehydrogenase activity	molecular_function	Citrate cycle (TCA cycle)	MDH2	Glyoxylate and dicarboxylate metabolism	MDH2	Pyruvate metabolism	MDH2	Carbon fixation in photosynthetic organisms	MDH2	Cysteine and methionine metabolism	MDH2
GO:0016616	oxidoreductase activity, acting on the CH-OH group of donors, NAD or NADP as acceptor	molecular_function	Citrate cycle (TCA cycle)	MDH2	Glyoxylate and dicarboxylate metabolism	MDH2	Pyruvate metabolism	MDH2	Carbon fixation in photosynthetic organisms	MDH2	Cysteine and methionine metabolism	MDH2
GO:0009505	plant-type cell wall	biological_process	Citrate cycle (TCA cycle)	MDH2	Glyoxylate and dicarboxylate metabolism	MDH2	Pyruvate metabolism	MDH2	Carbon fixation in photosynthetic organisms	MDH2	Cysteine and methionine metabolism	MDH2
GO:0003824	catalytic activity	molecular_function	Citrate cycle (TCA cycle)	MDH2	Glyoxylate and dicarboxylate metabolism	MDH2	Pyruvate metabolism	MDH2	Carbon fixation in photosynthetic organisms	MDH2	Cysteine and methionine metabolism	MDH2
GO:0006099	tricarboxylic acid cycle	biological_process	Citrate cycle (TCA cycle)	MDH2	Glyoxylate and dicarboxylate metabolism	MDH2	Pyruvate metabolism	MDH2	Carbon fixation in photosynthetic organisms	MDH2	Cysteine and methionine metabolism	MDH2
GO:0030060	L-malate dehydrogenase activity	molecular_function	Citrate cycle (TCA cycle)	MDH2	Glyoxylate and dicarboxylate metabolism	MDH2	Pyruvate metabolism	MDH2	Carbon fixation in photosynthetic organisms	MDH2	Cysteine and methionine metabolism	MDH2
GO:0019752	carboxylic acid metabolic process	biological_process	Citrate cycle (TCA cycle)	MDH2	Glyoxylate and dicarboxylate metabolism	MDH2	Pyruvate metabolism	MDH2	Carbon fixation in photosynthetic organisms	MDH2	Cysteine and methionine metabolism	MDH2
GO:0006108	malate metabolic process	biological_process	Citrate cycle (TCA cycle)	MDH2	Glyoxylate and dicarboxylate metabolism	MDH2	Pyruvate metabolism	MDH2	Carbon fixation in photosynthetic organisms	MDH2	Cysteine and methionine metabolism	MDH2
GO:0016607	nuclear speck	cellular_component	Spliceosome	SRSF10, FUSIP1
GO:0003676	nucleic acid binding	molecular_function	Spliceosome	SRSF10, FUSIP1
GO:0000398	mRNA splicing, via spliceosome	biological_process	Spliceosome	SRSF10, FUSIP1
GO:0003723	RNA binding	molecular_function	Spliceosome	SRSF10, FUSIP1

## Sheet: Table S10
Table S10 List of common differentially expressed genes involved in Cd and Se uptake by melatonin and nano-zero valent iron (Cd vs Cd-nZVI and Cd vs Cd-MT-nZVI) and melatonin biosyntheic genes in O.sativa leaves under co-enriched Cd and Se paddy soil
					Cd													Se								Melatonin biosynthesis genes
Zinc-iron regulated transporters-like Proteins						natural resistance-associated macrophage proteins (Nramps)								phosphate transporter					sulphate transporter
Gene Name	Cd_MT_nZVI_vs_Cd_fc(Cd_MT_nZVI/Cd)	Cd_MT_nZVI_vs_Cd_regulate	Cd_nZVI_vs_Cd_fc(Cd_nZVI/Cd)	Cd_nZVI_vs_Cd_regulate		Gene Name	Cd_MT_nZVI_vs_Cd_fc(Cd_MT_nZVI/Cd)	Cd_MT_nZVI_vs_Cd_regulate	Cd_nZVI_vs_Cd_fc(Cd_nZVI/Cd)	Cd_nZVI_vs_Cd_regulate			Gene Name	Cd_MT_nZVI_vs_Cd_fc(Cd_MT_nZVI/Cd)		Cd_nZVI_vs_Cd_fc(Cd_nZVI/Cd)			Gene Name	Cd_MT_nZVI_vs_Cd_fc(Cd_MT_nZVI/Cd)		Cd_nZVI_vs_Cd_fc(Cd_nZVI/Cd)			Gene Name	Cd_MT_nZVI_vs_Cd_fc(Cd_MT_nZVI/Cd)		Cd_nZVI_vs_Cd_fc(Cd_nZVI/Cd)
OsZIP9	2.89603	up	1.98389	up		OsNRAMP6	1.27816	up	0.776895	down			PT8	1.89176	up	5.40606	up		SULTR3	2.91399	up	1.17348	up		TDC2	1.07968	up	1.56854	up
OsZIP4	1.8003	up	0.90974	down		OsNRAMP7	1.08335	up	0.688398	down			OsPT5	0.405031	down	24.303	up		OsSultr2	1.41663	up	0.980637	down		OsTDC3	12.7195	up	1.83869	up
OsZIP4	1.66528	up	1.54771	up		NRAMP2	0.828506	down	1.2459	up			PT1	1.45913	up	1.8031	up		OsSultr1	1.66613	up	1.24905	up		TDC1	13.3467	up	3.38493	up
OsZIP1	0.303194	down	1.56521	up		NRAMP4	1.81275	up	2.03052	up			OsPT21	0.753446	down	1.23345	up		OsSultr3	1.24453	up	2.11381	up
OsZIP8	1.17224	up	1.51716	up		NRAMP3	1.6351	up	1.9651	up			PT4	1.15015	up	0.557733	down		OsSultr3	3.10982	up	5.71671	up		OsSNAT1	0.80641	down	0.954241	down
OsZIP7	1.02447	up	1.34307	up		NRAMP5	6.35353	up	0.265221	down			OsPT24	1.01173	up	1.93617	up		OsSultr5	1.38569	up	0.820538	down		OsSNAT2	0.82637	down	0.405573	down
OsZIP10	0.730297	down	1.3227	up		NRAMP1	1.01665	up	1.36341	up			OsPT25	1.01463	up	0.270821	down		OsSultr3	2.00046	up	4.55949	up
OsZIP2	1.634	up	0.912442	down									OsPT14	0.750572	down	0.381366	down		OsSultr4	0.635804	down	0.474977	down		ASMT	0.698792	down	0.362716	down
Heavy metal ATPase						low-affinity cation transporter gene & ATP-binding cassette (ABC) sub family C member							OsPT26	1.27787	up	1.90567	up		OsSultr1	0.164479	down	0.171286	down
Gene Name	Cd_MT_nZVI_vs_Cd_fc(Cd_MT_nZVI/Cd)	Cd_MT_nZVI_vs_Cd_regulate	Cd_nZVI_vs_Cd_fc(Cd_nZVI/Cd)	Cd_nZVI_vs_Cd_regulate		Gene Name	Cd_MT_nZVI_vs_Cd_fc(Cd_MT_nZVI/Cd)	Cd_MT_nZVI_vs_Cd_regulate	Cd_nZVI_vs_Cd_fc(Cd_nZVI/Cd)	Cd_nZVI_vs_Cd_regulate			OsPT23	2.59886	up	2.52286	up		OsSultr1	0.818916	down	0.883178	down		OsCOMTL2	123.291	up	20.7361	up
OsHMA6	0.5994	down	0.313937	down		OsLCT1	1.41313	up	6.63502	up			OsPT17	1.11344	up	0.628066	down		OsSultr2	0.0505741	down	1.06016	up
OsHMA5	0.835907	down	0.768393	down									OsPT15	0.750602	down	1.27865	up		OsSultr2	0.987218	down	2.43541	up
OsHMA1	0.75685	down	0.751415	down		OsABCC9	2.37131	up	1.65508	up			OsPT13	0.85793	down	1.58102	up			Silicon and aquaporin transporter
HMA2	1.3308	up	1.14789	up		Metallothionein							OsPT18	0.827199	down	0.808114	down		Gene Name	Cd_MT_nZVI_vs_Cd_fc(Cd_MT_nZVI/Cd)		Cd_nZVI_vs_Cd_fc(Cd_nZVI/Cd)
HMA5	1.70639	up	0.673677	down		Gene Name	Cd_MT_nZVI_vs_Cd_fc(Cd_MT_nZVI/Cd)	Cd_MT_nZVI_vs_Cd_regulate	Cd_nZVI_vs_Cd_fc(Cd_nZVI/Cd)	Cd_nZVI_vs_Cd_regulate			OsPT19	5.88749	up	7.46245	up		LSI1	1.28224	up	2.33748	up
HMA3	0.666917	down	0.371619	down		OsMT2c	0.726869	down	0.784123	down			OsPT16	0.891108	down	0.929211	down		OsNIP1	9.22837	up	3.46618	up
HMA9	1.50682	up	2.33022	up		OsMT1a	0.773031	down	0.235511	down			OsPT25	1.01463	up	0.270821	down		OsNIP1	1.60606	up	1.92312	up
HMA4	1.05577	up	0.619164	down		MT1A	1.43868	up	0.973289	down			SYG1/PHO81/XPR1 (SPX) and major facilitator superfamily (MFS)						OsNIP1	2.61529	up	1.93014	up
phytochelatin synthase						OsMT2b	0.648034	down	0.747679	down			Gene Name	Cd_MT_nZVI_vs_Cd_fc(Cd_MT_nZVI/Cd)		Cd_nZVI_vs_Cd_fc(Cd_nZVI/Cd)			OsNIP1	2.04439	up	0.416611	down
Gene Name	Cd_MT_nZVI_vs_Cd_fc(Cd_MT_nZVI/Cd)	Cd_MT_nZVI_vs_Cd_regulate	Cd_nZVI_vs_Cd_fc(Cd_nZVI/Cd)	Cd_nZVI_vs_Cd_regulate		OsMT4	0.0417855	down	0.0434518	down			OsSPX-MFS4	0.680594	down	1.43985	up		OsRFPH2-17	1.16044	up	0.9446	down
OsPCS1	1.93307	up	1.00908	up		OsMT3a	0.605264	down	0.568401	down			OsSPX-MFS3	0.580827	down	0.409172	down		LSI6	3.80403	up	4.32469	up
OsPCS2b	1.12473	up	1.19998	up		OsMT2a	0.928785	down	0.586079	down			OsSPX-MFS2	0.569796	down	0.648323	down			amino acid protein
Metal tolerance protein						OsMT1b	2.51796	up	2.81001	up			OsSPX-MFS1	1.00507	up	0.991852	down		Gene Name	Cd_MT_nZVI_vs_Cd_fc(Cd_MT_nZVI/Cd)		Cd_nZVI_vs_Cd_fc(Cd_nZVI/Cd)
Gene Name	Cd_MT_nZVI_vs_Cd_fc(Cd_MT_nZVI/Cd)	Cd_MT_nZVI_vs_Cd_regulate	Cd_nZVI_vs_Cd_fc(Cd_nZVI/Cd)	Cd_nZVI_vs_Cd_regulate		MTd	0.4533	down	0.438606	down				vacuolar Pi efflux transporters					OsAAP11G	1.8931	up	1.8149	up
OsMTP9	1.3554	up	1.56019	up		Cadmium tolerance							Gene Name	Cd_MT_nZVI_vs_Cd_fc(Cd_MT_nZVI/Cd)		Cd_nZVI_vs_Cd_fc(Cd_nZVI/Cd)			OsAAP11C	2.24926	up	1.61788	up
OsMTP5	1.18109	up	1.18783	up		Gene Name	Cd_MT_nZVI_vs_Cd_fc(Cd_MT_nZVI/Cd)	Cd_MT_nZVI_vs_Cd_regulate	Cd_nZVI_vs_Cd_fc(Cd_nZVI/Cd)	Cd_nZVI_vs_Cd_regulate			OsVPE3	0.877044	down	1.0125	up		OsAAP11B	1.76059	up	3.98805	up
OsMTP6	1.03162	up	0.728802	down		OsCDT5	1.89803	up	0.575443	down			OsVPE2	0.819245	down	0.514936	down		OsAAP11A	2.09999	up	2.39094	up
OsMTP11	0.799266	down	1.46206	up		OsCDT4	0.841628	down	0.346619	down			OsVPE4	1.23211	up	0.332242	down		OsAAP3	1.01713	up	0.552634	down
OsMTP12	1.05924	up	1.36137	up		OsCDT2	0.754721	down	0.646761	down				nitrate transporter					OsAAP11F	1.40325	up	1.46662	up
OsMTP7	0.99636	down	1.17028	up									Gene Name	Cd_MT_nZVI_vs_Cd_fc(Cd_MT_nZVI/Cd)		Cd_nZVI_vs_Cd_fc(Cd_nZVI/Cd)
OsMTP11.1	7.36756	up	2.45667	up									OsNRT1.4	1.30937	up	0.765482	down
OsMTP1	1.16861	up	0.806506	down									NRT1.1B	1.92417	up	1.46223	up
OsMTP8.1	0.972214	down	0.632015	down									OsNRT1.1A	1.55035	up	0.73651	down
													OsNRT1.3B	0.320357	down	0.171286	down
													OsNRT1.5B	0.760443	down	0.162431	down
													OsNRT1.7	2.26154	up	1.41999	up
													OsNRT1	1.18467	up	1.72218	up
													OsNRT1.3A	0.917939	down	0.873062	down
													OsNRT1.2	1.07017	up	0.859265	down
													OsNRT1.1C	0.551101	down	0.574683	down
													OsNRT1.5A	0.953732	down	0.256486	down
													OsNRT1.1A	1.55035	up	0.73651	down
													OsNRT1.4	1.30937	up	0.765482	down
